# Supplementary material for: Efficient synthesis of piperazinyl amides of 18β-glycyrrhetinic acid
Source: PubMed Central journal article supplement (PMC7188925; doi:10.3762/bjoc.16.73), 2020-04-21
Supplement: Beilstein_J_Org_Chem-16-798-s001.pdf [file Beilstein_J_Org_Chem-16-798-s001.pdf]

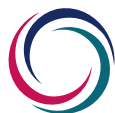

## Supporting Information

for

### Efficient synthesis of piperazinyl amides of 18 $\beta$ -glycyrrhetic acid

Dong Cai, ZhiHua Zhang, Yufan Meng, KaiLi Zhu, LiYi Chen, ChangXiang Yu, ChangWei Yu, ZiYi Fu, DianShen Yang and YiXia Gong

*Beilstein J. Org. Chem.* **2020**, *16*, 798–808. doi:10.3762/bjoc.16.73

### Preparation procedures and analytical data of compounds 1, 4–9, 11, 13, 15–18

## Table of contents

|                                                                        |       |
|------------------------------------------------------------------------|-------|
| Synthetic procedures.....                                              | S1–17 |
| <sup>1</sup> H and <sup>13</sup> C NMR and HRMS of compound (1) .....  | S19   |
| <sup>1</sup> H and <sup>13</sup> C NMR and HRMS of compound (8) .....  | S20   |
| <sup>1</sup> H and <sup>13</sup> C NMR and HRMS of compound (12) ..... | S22   |
| <sup>1</sup> H and <sup>13</sup> C NMR and HRMS of compound (6) .....  | S23   |
| <sup>1</sup> H and <sup>13</sup> C NMR and HRMS of compound (7) .....  | S25   |
| <sup>1</sup> H and <sup>13</sup> C NMR and HRMS of compound (9) .....  | S26   |
| <sup>1</sup> H and <sup>13</sup> C NMR and HRMS of compound (14) ..... | S28   |
| <sup>1</sup> H and <sup>13</sup> C NMR and HRMS of compound (11) ..... | S29   |
| <sup>1</sup> H and <sup>13</sup> C NMR and HRMS of compound (15) ..... | S31   |
| <sup>1</sup> H and <sup>13</sup> C NMR and HRMS of compound (13) ..... | S32   |
| <sup>1</sup> H and <sup>13</sup> C NMR and HRMS of compound (16) ..... | S34   |
| <sup>1</sup> H and <sup>13</sup> C NMR and HRMS of compound (4) .....  | S35   |
| HRMS of compound (5) .....                                             | S36   |
| <sup>1</sup> H and <sup>13</sup> C NMR and HRMS of compound (17) ..... | S37   |
| <sup>1</sup> H and <sup>13</sup> C NMR and HRMS of compound (18) ..... | S38   |

# Experimental

## Materials and methods

Unless otherwise required, all reagents used in the experiment were purchased as commercial analytical grade and used without further purification. Melting points were obtained in open capillary tubes with a WRS-1B melting point apparatus and were uncorrected (Shen Guang Electric Appliances Co., Ltd., Shanghai, CHN). The structures of the synthetic compounds were confirmed by  $^1\text{H}$  NMR and  $^{13}\text{C}$  NMR spectra on 400/54Premium Shielded NMR Magnet System (Agilent Technologies, Santa Clara, CA, USA) with tetramethylsilane (TMS) as an internal standard. HRMS spectral data were collected from an Agilent 6200 Series TOF and 6500 Series Q-TOF LC/MS System B.05.01. (B5125) and Thermo Scientific LTQ-Orbitrap XL in positive ion modes (Agilent Technologies, Santa Clara, CA, USA). X-ray single-crystal structure determinations were carried out on a Bruker SMART APEX II CCD diffractometer (Bruker AXS GMBH, Karlsruhe, GER).

## Synthesis of 18 $\beta$ -GA analogs

### *3 $\beta$ -Acetoxy-11-oxo-18 $\beta$ -olean-12-en-30-oic acid (2)*

18 $\beta$ -Glycyrrhetic acid (0.47 g, 1.0 mmol) was heated at 130 °C with acetic anhydride (2.04 g, 20 mmol) for 1 h. Then, H<sub>2</sub>O was added to the cool solution. The product was filtered off and washed with cold H<sub>2</sub>O.

A white solid; yield, 99.2%; m.p. 304.4.0-306.1 °C (literature [1]: 312.0-313.0 °C); <sup>1</sup>H NMR (400 MHz, Chloroform-*d*) δ 5.69 (d, *J* = 1.7 Hz, 1H, CH-12), 4.50 (dt, *J* = 11.7, 2.8 Hz, 1H, CH-3), 2.77 (dd, *J* = 14.0, 4.0 Hz, 1H, CH-1), 2.35 (s, 1H, CH-9), 2.03 (s, 2H, acetyloxy CH<sub>3</sub>), 1.35 (m, 3H, CH<sub>3</sub>-27), 1.21 (s, 3H, CH<sub>3</sub>-25), 1.14 (s, 3H, CH<sub>3</sub>-26), 1.10 (s, 3H, CH<sub>3</sub>-29), 0.86 (s, 6H, CH<sub>3</sub>-23/24), 0.85 (s, 3H, CH<sub>3</sub>-28), 0.77 (m, 1H, CH-5); <sup>13</sup>C NMR (101 MHz, Chloroform-*d*) δ 200.41 (C11), 181.77 (30), 171.08 (acetyloxy C=O), 169.55 (C13), 128.37 (C12), 80.61 (C3), 61.66 (C9), 54.97 (C5), 48.21 (C18), 45.44 (C14), 43.79 (C20), 43.17 (C8), 40.78 (C19), 38.73 (C1), 38.02 (C4), 37.67 (C22), 36.89 (C10), 32.66 (C7), 31.84 (C17), 30.86 (C21), 28.52 (C29), 28.44 (C28), 28.02 (C23), 26.43 (C2), 26.35 (C15), 23.54 (C16), 23.32 (C27), 21.32 (acetyloxy CH<sub>3</sub>), 18.64 (C26), 17.33 (C6), 16.67 (C25), 16.39 (C24). HRMS (*m/z*): [M + H]<sup>+</sup> calcd. for C<sub>32</sub>H<sub>49</sub>O<sub>5</sub>: 513.3580, found: 513.3580.

General procedure for the preparation of compounds **(4)** and **(5)**

The compound **3** (0.44 g, 0.90 mmol) was dissolved in CH<sub>2</sub>Cl<sub>2</sub> (30 mL) at 0 °C under stirring, then triethylamine (0.3 g, 3.00 mmol) and anhydrous piperazine (0.23 g, 2.70 mmol) were added. The reaction was stirred at 0 °C for 30 min. After reaction, the mixture was removed, and the residue was subjected to column chromatography (silica gel, CH<sub>2</sub>Cl<sub>2</sub>-methanol, 5:1) to yield compounds **(4)** and **(5)**.

*3β*-Acetoxy-11-oxo-18β-olean-12-en-30-carbonyl piperazine **(4)** A white solid; yield, 36.1%; m.p. 237.2-239.0 °C (literature [2]: 160 °C-decomp.); <sup>1</sup>H NMR (400

MHz, Chloroform-*d*)  $\delta$  5.67 (s, 1H, CH-12), 4.49 (dd,  $J = 11.7, 4.8$  Hz, 1H, CH-3), 3.61 (q,  $J = 4.7$  Hz, 4H, piperazine CH<sub>2</sub>×2), 2.85 (t,  $J = 5.0$  Hz, 4H, piperazine CH<sub>2</sub>×2), 2.77 (dt,  $J = 13.7, 3.6$  Hz, 1H, CH-1), 2.33 (s, 1H, CH-9), 2.29 – 2.23 (m, 1H, CH-16), 2.16 (s, 3H, acetyloxy CH<sub>3</sub>), 1.33 (s, 3H, CH<sub>3</sub>-27), 1.20 (s, 3H, CH<sub>3</sub>-25), 1.13 (s, 3H, CH<sub>3</sub>-26), 1.10 (s, 3H, CH<sub>3</sub>-29), 0.85 (s, 6H, CH<sub>3</sub>-23/24), 0.79 (s, 3H, CH<sub>3</sub>-28), 0.76 (m, 1H, CH-5); <sup>13</sup>C NMR (101 MHz, Chloroform-*d*)  $\delta$  200.01 (C11), 173.86 (C30), 171.03 (acetyloxy C=O), 169.67 (C13), 128.46 (C12), 80.59 (C3), 61.67 (C9), 54.99 (C5), 48.21(C18), 46.13 (piperazine C×2), 45.27 (C14), 43.77 (C20), 43.71 (C8), 43.26 (piperazine C×2), 38.78 (C19), 38.01 (C1/4), 37.73 (C22), 36.91 (C10), 33.38 (C7), 32.72 (C17), 31.76 (C21), 28.41 (C29), 28.02 (C28), 27.02 (C23), 26.69 (C2), 26.41 (C15), 23.54 (C16), 23.07 (C27), 21.32 (acetyloxy CH<sub>3</sub>), 18.65 (C26), 17.35 (C6), 16.66 (C25), 16.41 (C24); HRMS ( $m/z$ ): [M + H]<sup>+</sup> calcd. for C<sub>36</sub>H<sub>57</sub>N<sub>2</sub>O<sub>4</sub>: 581.4318, found: 581.4316.

**Bisamide (5)** A white solid; yield, 64.6%; m.p. 211.4-212.0 °C. HRMS ( $m/z$ ): [M + Na]<sup>+</sup> calcd. for C<sub>68</sub>H<sub>102</sub>N<sub>2</sub>NaO<sub>8</sub>: 1097.7534, found: 1097.7535.

***3 $\beta$ -Acetyloxy -11-oxo-18 $\beta$ -olean-12-en-30-carbonyl piperazine (4)***

Compound **8** (0.68 g, 1.0 mmol) was dissolved in CH<sub>2</sub>Cl<sub>2</sub> (10 mL) at 0 °C under stirring. Trifluoroacetic acid (5 mL) was added, and the reaction was stirred at 0 °C for 3 h. After reaction, the mixture was made basic with a saturated Na<sub>2</sub>CO<sub>3</sub> solution. This mixture was extracted with CH<sub>2</sub>Cl<sub>2</sub>, dried over Na<sub>2</sub>SO<sub>4</sub>, and concentrated to give the desired product.

A white solid; yield, 94.1%; the chemical structures were characterized as above.

*1H-Benzo[d][1,2,3]triazol-1-yl-3 $\beta$ -acetoxy-11-oxo-olean-12-en-30-oate (6)*

Compound **2** (0.51 g, 1.0 mmol) was dissolved in acetonitrile (20 mL), then EDCI (0.23 g, 1.2 mmol), triethylamine (0.13 g, 1.2 mmol) and HOBT (0.16 g, 1.2 mmol) were added. The mixture was stirred at room temperature for 1 h. The solvent was removed under vacuum to give a residue which was treated with a mixture of ethanol and water. The solution was stirred at room temperature for 30 min, and a solid was obtained by filtration while washing with H<sub>2</sub>O.

A white solid; yield, 97.8%; m.p. 208.7 °C - decomp. (literature [3]: 192-195 °C, decomp.); <sup>1</sup>H NMR (400 MHz, Chloroform-*d*)  $\delta$  8.08 (d, *J* = 8.4 Hz, 1H, phenyl), 7.56 (t, *J* = 7.6 Hz, 1H, phenyl), 7.44 (t, *J* = 7.7 Hz, 1H, phenyl), 7.34 (d, *J* = 8.3 Hz, 1H, phenyl), 5.71 (s, 1H, CH-12), 3.22 (dd, *J* = 10.7, 5.5 Hz, 1H, OH-3), 2.77 (dt, *J* = 13.5, 3.6 Hz, 1H, CH-1), 2.39 – 2.23 (m, 2H, CH-9/16), 1.41 (s, 3H, CH<sub>3</sub>-27), 1.15 (s, 3H, CH<sub>3</sub>-25), 1.13 (s, 3H, CH<sub>3</sub>-26), 1.00 (s, 3H, CH<sub>3</sub>-29), 0.93 (s, 3H, CH<sub>3</sub>-23), 0.80 (s, 3H, CH<sub>3</sub>-24), 0.72 (d, *J* = 11.6 Hz, 1H, CH-5); <sup>13</sup>C NMR (101 MHz, Chloroform-*d*)  $\delta$  199.91 (C11), 172.51 (C30), 167.60 (C13), 143.54 (phenyl), 129.02 (phenyl), 128.83 (phenyl), 128.54 (C12), 124.82 (phenyl), 120.66, (phenyl) 107.81 (phenyl), 78.70 (C3), 61.83 (C9), 54.89 (C5), 48.20 (C18), 45.36 (C20), 44.36(C8), 43.15(C19), 40.85 (C1), 39.11 (C4), 37.75 (C22), 37.06 (C10), 32.72 (C7), 31.97 (C17),

31.16 (C21), 28.54 (C29), 28.08 (C28), 28.02 (C23), 27.25 (C2), 26.34 (C15/16), 23.48 (C27), 18.67 (C26), 17.45 (C6), 16.34 (C25), 15.57 (C24); HRMS ( $m/z$ ):  $[M + H]^+$  calcd. for  $C_{36}H_{50}N_3O_4$ : 588.3801, found: 588.3801.

*1H-Benzo[d][1,2,3]triazol-1-yl-3 $\beta$ -hydroxy-11-oxo-olean-12-en-30-oate (7)*

18 $\beta$ -Glycyrrhetic acid (0.47 g, 1.0 mmol) was dissolved in acetonitrile (20 mL), then EDCI (0.23 g, 1.2 mmol), triethylamine (0.13 g, 1.2 mmol) and HOBt (0.16 g, 1.2 mmol) were added. The mixture was stirred at room temperature for 1 h. The solvent was removed under vacuum to give a residue which was treated with a mixture of ethanol and water. The solution was stirred at room temperature for 30 min, and a solid was obtained by filtration while washing with H<sub>2</sub>O.

A white solid; yield, 97.2%; m.p. 263.4-264.4 °C; <sup>1</sup>H NMR (400 MHz, Chloroform-*d*)  $\delta$  8.09 (d,  $J = 8.4$  Hz, 1H, phenyl), 7.57 (t,  $J = 7.6$  Hz, 1H, phenyl), 7.44 (t,  $J = 7.7$  Hz, 1H, phenyl), 7.35 (d,  $J = 8.3$  Hz, 1H, phenyl), 5.72 (s, 1H, CH-12), 4.52 (dd,  $J = 11.6, 4.8$  Hz, 1H, CH-3), 2.78 (dt,  $J = 13.8, 3.7$  Hz, 1H, CH-1), 2.37 (s, 1H, CH-9), 2.05 (s, 3H, acetyloxy CH<sub>3</sub>), 1.41 (s, 3H, CH<sub>3</sub>-27), 1.21 (s, 3H, CH<sub>3</sub>-25), 1.16 (s, 6H, CH<sub>3</sub>-26/29), 0.94 (s, 3H, CH<sub>3</sub>-23), 0.88 (s, 6H, CH<sub>3</sub>-24/28), 0.80 (m, 1H, CH-5); <sup>13</sup>C NMR (101 MHz, Chloroform-*d*)  $\delta$  199.76 (C11), 172.51 (30), 171.01 (acetyloxy C=O), 167.60 (C13), 143.55 (phenyl), 128.99 (phenyl), 128.81 (phenyl), 128.54 (C12), 124.80 (phenyl), 120.67 (phenyl), 107.80 (phenyl), 80.53 (C3), 61.74 (C9), 54.98 (C5), 48.19 (C18), 45.37 (C14), 44.35 (C20), 43.14 (C8), 40.84 (C19), 38.74 (C1), 38.02

(C4), 37.74 (C22), 36.91 (C10), 32.67 (C7), 31.97 (C17), 31.17 (C21), 28.53 (C29), 28.02 (C28/23), 26.33 (C2/15), 23.52 (C16), 23.42 (C27), 21.32 (acetyloxy CH<sub>3</sub>), 18.67 (C26), 17.34 (C6), 16.66 (C25), 16.38 (C24); HRMS (*m/z*): (M + H<sup>+</sup>) calcd. for C<sub>38</sub>H<sub>52</sub>N<sub>3</sub>O<sub>5</sub>: 630.3907, found: 630.3904.

*tert*-Butyl 4-(3 $\beta$ -acetoxy-11-oxo-18 $\beta$ -olean-12-en-30-carbonyl)piperazine-1-carboxylate (**8**)

Method A: Compound **2** (0.51 g, 1.0 mmol) was dissolved in acetonitrile (20 mL), then EDCI (0.23 g, 1.2 mmol), triethylamine (0.13 g, 1.2 mmol) and HOBT (0.16 g, 1.2 mmol) were added. The mixture was stirred at room temperature for 20 min. The 1-Boc-piperazine (0.46 g, 2.5 mmol) was added, and the mixture was stirred under reflux for 10 h. The solvent was removed under vacuum to give a residue which was treated with a mixture of ethanol and water. The solution was stirred at room temperature for 30 min, and a solid was obtained by filtration while washing with H<sub>2</sub>O.

Method B: Compound **9** (0.64 g, 1.0 mmol) was heated at 130 °C with acetic anhydride (2.04 g, 20 mmol) for 1 h. Then, H<sub>2</sub>O was added to the cool solution. The product was filtered off and washed with cold H<sub>2</sub>O.

A white solid; yield, 95.7%; m.p. 221.6-223.0 °C; <sup>1</sup>H NMR (400 MHz, Chloroform-*d*)  $\delta$  5.66 (s, 1H, CH-12), 4.50 (dd, *J* = 11.7, 4.7 Hz, 1H, CH-3), 3.66 – 3.50 (m, 4H, piperazine CH<sub>2</sub>×2), 3.40 (d, *J* = 5.1 Hz, 4H, piperazine CH<sub>2</sub>×2), 2.79-2.74 (m, 1H, CH-1), 2.33 (s, 1H, CH-9), 2.30 – 2.22 (m, 1H, CH-16), 2.03 (s, 3H, acetyloxy CH<sub>3</sub>), 1.45 (s, 9H, *tert*-butyl CH<sub>3</sub>×3), 1.33 (s, 3H, CH<sub>3</sub>-27), 1.20 (s, 3H,



CH<sub>3</sub>-25), 1.14 (s, 3H, CH<sub>3</sub>-26), 1.09 (s, 3H, CH<sub>3</sub>-29), 0.85 (s, 6H, CH<sub>3</sub>-23/24), 0.79 (s, 3H, CH<sub>3</sub>-28), 0.76 (m, 1H, CH-5); <sup>13</sup>C NMR (101 MHz, Chloroform-*d*) δ 199.95 (C11), 174.12 (C30), 171.03 (acetyloxy C=O), 169.46 (C13), 154.52 (Boc C=O), 128.50 (C12), 80.58 (tert-butyl C), 80.24 (C3), 61.67 (C9), 54.99 (C5), 48.12 (C18), 45.27 (C14), 43.87 (piperazine C×2), 43.75 (C20), 43.25 (C8/19), 38.77 (C1/C4), 38.01 (piperazine C×2), 37.70 (C22), 36.90 (C10), 33.22 (C7), 32.72 (C17), 31.75 (C21), 28.40 (C29), 28.35 (tert-butyl CH<sub>3</sub>×3), 28.02 (C28), 27.05 (C23), 26.68 (C2), 26.38 (C15), 23.54 (C16), 23.08 (C27), 21.31 (acetyloxy CH<sub>3</sub>), 18.65 (C26), 17.35 (C6), 16.66 (C25), 16.40 (C24); HRMS (*m/z*): [M + H]<sup>+</sup> calcd. for C<sub>41</sub>H<sub>65</sub>N<sub>2</sub>O<sub>6</sub>: 681.4843, found: 681.4841.

*tert*-Butyl 4-(3β-hydroxyl-11-oxo-18β-olean-12-en-30-carbonyl)piperazine-1-carboxylate (**9**)

18β-Glycyrrhetic acid (0.47 g, 1.0 mmol) was dissolved in acetonitrile (20 mL), then EDCI (0.23 g, 1.2 mmol), triethylamine (0.13 g, 1.2 mmol) and HOBT (0.16 g, 1.2 mmol) were added. The mixture was stirred at room temperature for 20 min. The 1-Boc-piperazine (0.46 g, 2.5 mmol) was added, and the mixture was stirred under reflux for 10 h. The solvent was removed under vacuum to give a residue which was treated with a mixture of ethanol and water. The solution was stirred at room temperature for 30 min, and a solid was obtained by filtration while washing with H<sub>2</sub>O.

A white solid; yield, 94.3%; m.p. 224.3-225.7 °C; <sup>1</sup>H NMR (400 MHz, Chloroform-*d*) δ 5.66 (s, 1H, CH-12), 3.63-3.52 (m, 4H, piperazine CH<sub>2</sub>×2), 3.39 (t, *J* = 5.2

Hz, 4H, piperazine CH<sub>2</sub>×2), 3.22-3.18 (m, 1H, OH-3), 2.79-2.74 (m, 1H, CH-1), 2.31 (s, 1H, CH-9), 2.30-2.23 (m, 1H, CH-16), 1.45 (s, 9H, tert-butyl CH<sub>3</sub>×3), 1.34 (s, 3H, CH<sub>3</sub>-27), 1.20 (s, 3H, CH<sub>3</sub>-25), 1.11 (s, 3H, CH<sub>3</sub>-26), 1.10 (s, 3H, CH<sub>3</sub>-29), 0.98 (s, 3H, CH<sub>3</sub>-23), 0.79 (s, 3H, CH<sub>3</sub>-24), 0.78 (s, 3H, CH<sub>3</sub>-28), 0.68 (d, *J* = 11.6 Hz, 1H, CH-5); <sup>13</sup>C NMR (101 MHz, Chloroform-*d*) δ 200.10 (C11), 174.13 (C30), 169.40 (C13), 154.53 (Boc C=O), 128.56 (C12), 80.25 (C3), 78.75 (tert-butyl C), 61.77 (C9), 54.92 (C5), 48.08 (C18), 45.26 (C14), 43.88 (C20), 43.82 (piperazine C×2), 43.26 (C8/C19), 39.12 (C1/C4), 39.10 (piperazine C×2), 37.70 (C22), 37.06 (C10), 33.16 (C7), 32.79 (C17), 31.75 (C21), 28.40 (C29), 28.36 (tert-butyl CH<sub>3</sub>×3), 28.07 (C28), 27.28 (C23), 27.05 (C2), 26.69 (C15), 26.39 (C16), 23.14 (C27), 18.66 (C26), 17.46 (C6), 16.36 (C25), 15.56 (C24); HRMS (*m/z*): [M + H]<sup>+</sup> calcd. For C<sub>39</sub>H<sub>63</sub>N<sub>2</sub>O<sub>5</sub>: 639.4737, found: 639.4736.

*N*-(2-chloroacetyl) piperazinyl 3β-(2-chloroacetoxyl)-11-oxo-18β-olean-12-en-29-amide (**11**)

Compound **9** (0.64 g, 1.0 mmol) was heated at 130 °C with chloroacetic anhydride (3.42 g, 20 mmol) for 1 h. Then, H<sub>2</sub>O was added to the cool solution. The product was filtered, washed with cold H<sub>2</sub>O and dried.

A white solid; yield, 99%; m.p. 177.4-175.7 °C; <sup>1</sup>H NMR (400 MHz, Chloroform-*d*) δ 5.67 (s, 1H, CH-12), 4.60 (dd, *J* = 11.8, 4.7 Hz, 1H, CH-3), 4.14 – 3.99 (m, 4H, piperazine CH<sub>2</sub>×2), 3.73 – 3.66 (m, 4H, piperazine CH<sub>2</sub>×2), 3.66 – 3.55 (m, 2H, CH<sub>2</sub>-Cl), 3.53 (d, *J* = 5.4 Hz, 2H, CH<sub>2</sub>-Cl), 2.81 (dt, *J* = 13.8, 3.7 Hz, 1H, CH-1), 2.35 (s, 1H, CH-9), 2.30 (dd, *J* = 13.4, 3.8 Hz,

1H, CH-16), 1.35 (m, 3H, CH<sub>3</sub>-27), 1.23 (s, 3H, CH<sub>3</sub>-25), 1.15 (s, 3H, CH<sub>3</sub>-26), 1.11 (s, 3H, CH<sub>3</sub>-29), 0.89 (s, 6H, CH<sub>3</sub>-23/24), 0.81 (s, 3H, CH<sub>3</sub>-28), 0.79 (m, 1H, CH-5); <sup>13</sup>C NMR (101 MHz, chloroform-*d*) δ 199.81 (C11), 174.25 (C30), 169.44 (C13), 167.12 (chloroacetoxy C=O), 165.32 (chloroacetoxy C=O), 128.50 (C12), 82.97 (C3), 61.60 (C9), 54.93 (C5), 48.04 (C18), 46.27 (C14), 45.25 (piperazine C), 43.92 (piperazine C), 43.83 (C20), 43.26 (C8), 42.20 (C19), 41.24 (C1), 40.67 (C-Cl), 38.66 (C4), 38.21(piperazine C<sub>x2</sub>), 37.67 (C22), 36.86 (C10), 32.98 (C7), 32.66 (C17), 31.75 (C21), 28.39 (C29), 28.00 (C28), 27.02 (C23), 26.63 (C2), 26.34 (C15), 23.39 (C16), 23.10 (C27), 22.63, 18.64 (C26), 17.30 (C6), 16.60 (C25), 16.40 (C24); HRMS (*m/z*): [M + H]<sup>+</sup> calcd. for C<sub>38</sub>H<sub>57</sub>Cl<sub>2</sub>N<sub>2</sub>O<sub>5</sub>: 691.3645, found: 691.3641.

***3β-(2-Chloroacetoxy)-11-oxo-18β-olean-12-en-30-oic acid (12)***

18β-Glycyrrhetic acid (0.47 g, 1.0 mmol) was heated at 130 °C with chloroacetic anhydride (3.42 g, 20 mmol) for 1 h. Then, H<sub>2</sub>O was added to the cool solution. The product was filtered off and washed with cold H<sub>2</sub>O.

A white solid; yield, 98.0%; m.p. 259.0 °C - decomp. (literature [1]: 260.8–261.8 °C); <sup>1</sup>H NMR (400 MHz, Chloroform-*d*) δ 5.70 (s, 1H, CH-12), 4.59 (dd, *J* = 11.8, 4.8 Hz, 1H, CH-3), 4.05 (d, *J* = 2.3 Hz, 2H, CH<sub>2</sub>-Cl), 2.81 (m, 1H, CH-1), 2.35 (s, 1H, CH-9), 2.17 (dd, *J* = 13.6, 4.1 Hz, 1H, CH-16), 1.36 (m, 3H, CH<sub>3</sub>-27), 1.21 (s, 3H, CH<sub>3</sub>-25), 1.15 (s, 3H, CH<sub>3</sub>-26), 1.11 (s, 3H, CH<sub>3</sub>-29), 0.88 (s, 6H, CH<sub>3</sub>-23/24), 0.82 (s, 3H, CH<sub>3</sub>-28), 0.78 (m, 1H, CH-5); <sup>13</sup>C NMR (101 MHz, Chloroform-*d*) δ 200.26 (C11), 181.51(C30), 169.59 (C13), 167.12 (acetyloxy

C=O), 128.37 (C12), 83.00 (C3), 61.60 (C9), 54.94 (C5), 48.21 (C18), 45.43 (C14), 43.78 (C20), 43.18 (C8), 41.24 (C19), 40.80 (C-Cl), 38.64 (C1), 38.23 (C4), 37.67 (C22), 36.87 (C10), 32.62 (C7), 31.84 (C17), 30.87 (C21), 28.52 (C29), 28.43 (C28), 28.00 (C23), 26.43 (C2), 26.34 (C15), 23.41 (C16), 23.35 (C27), 18.64 (C26), 17.30 (C6), 16.61 (C25), 16.39 (C24); HRMS ( $m/z$ ):  $[M + H]^+$  calcd. for  $C_{32}H_{48}ClO_5$ : 547.3190, found: 547.3188.

***3 $\beta$ -(2-Morpholinoacetoxy)-11-oxo-olean-12-ene-30-oic acid (13)***

Compound **12** (0.55 g, 1.0 mmol), morpholine (0.13 g, 1.5 mmol),  $K_2CO_3$  (0.69 g, 5.0 mmol) and a catalytic amount of  $I_2$  in absolute ethanol (15 mL) was stirred under reflux for 12 h. The reaction mixture was evaporated under reduced pressure and the residue was dissolved in ethanol/ $H_2O$  mixture and the white precipitate was collected by filtration.

A white solid; yield, 92.0%; m.p. 275.3–276.4 °C;  $^1H$  NMR (400 MHz, Chloroform- $d$ )  $\delta$  5.72 (t,  $J = 3.0$  Hz, 1H, CH-12), 4.60 (dd,  $J = 11.2, 5.5$  Hz, 1H, CH-3), 3.76 (d,  $J = 4.9$  Hz, 4H, morpholine), 3.26 – 3.20 (m, 2H,  $CH_2$ ), 2.80 (d,  $J = 12.9$  Hz, 1H, CH-1), 2.63 (s, 4H, morpholine), 2.37 (t,  $J = 3.0$  Hz, 1H, CH-9), 2.19 (d,  $J = 13.5$  Hz, 1H, CH-16), 2.05 – 1.01 (m, 17H), 1.37 (s, 3H,  $CH_3$ -27), 1.27 (s, 3H,  $CH_3$ -25), 1.16 (s, 3H,  $CH_3$ -26), 1.13 (s, 3H,  $CH_3$ -29), 0.87 (s, 3H,  $CH_3$ -23/24), 0.83 (s, 3H,  $CH_3$ -28), 0.80 (s, 1H, CH-5);  $^{13}C$  NMR (101 MHz, Chloroform- $d$ )  $\delta$  200.25 (C11), 181.03 (C30), 169.70 (C13), 169.51 (acetoxy, C=O), 128.40 (C12), 81.09 (C3), 66.67 (morpholine C $\times$ 2), 61.64 (C9), 59.53 (acetoxy,  $CH_2$ ), 54.93 (C5), 53.14 (morpholine C $\times$ 2), 48.25 (C18), 45.43 (C14), 43.75 (C20), 43.19

(C8), 40.90 (C19), 38.68 (C1), 38.07 (C4), 37.70 (C22), 36.89 (C10), 32.65 (C7), 31.86 (C17), 30.93 (C21), 28.55 (C29), 28.44 (C28), 28.13 (C23), 26.46 (C2), 26.37 (C15), 23.66 (C16), 23.36 (C27), 18.66 (C26), 17.36 (C6), 16.78 (C25), 16.42 (C24); HRMS ( $m/z$ ):  $[M + Na]^+$  calcd. For  $C_{36}H_{56}NO_6$ : 598.4108, found: 598.4150.

*tert-Butyl 4-(3 $\beta$ -(2-morpholinoacetoxy)-11-oxo-18 $\beta$ -olean-12-en-30-carbonyl)-piperazine-1-carboxylate (14)*

Compound **13** (0.60 g, 1.0 mmol) was dissolved in acetonitrile (20 mL), then EDCI (0.23 g, 1.2 mmol), triethylamine (0.13 g, 1.2 mmol) and HOBt (0.16 g, 1.2 mmol) were added. The mixture was stirred at room temperature for 20 min. The 1-Boc-piperazine (0.46 g, 2.5 mmol) was added, and the mixture was stirred under reflux for 10 h. The solvent was removed under vacuum to give a residue which was treated with a mixture of ethanol and water. The solution was stirred at room temperature for 30 min, and a solid was obtained by filtration while washing with  $H_2O$ .

A white solid; yield, 93.9%; m.p. 204.3-205.3 °C;  $^1H$  NMR (400 MHz, Chloroform- $d$ )  $\delta$  5.72 (t,  $J = 3.4$  Hz, 1H, CH-12), 4.69 – 4.58 (m, 1H, CH-3), 3.79 (dt,  $J = 6.5, 3.3$  Hz, 4H, morpholine  $CH_2 \times 2$ ), 3.72 – 3.59 (m, 4H, piperazine  $CH_2 \times 2$ ), 3.45 (d,  $J = 5.4$  Hz, 4H, piperazine  $CH_2 \times 2$ ), 3.25 (q,  $J = 2.2$  Hz, 2H, Morpholinoacetoxy  $CH_2$ ), 2.84 (d,  $J = 13.6$  Hz, 1H, CH-1), 2.64 (q,  $J = 5.1, 4.6$  Hz, 4H, morpholine  $CH_2 \times 2$ ), 2.39 (d,  $J = 3.3$  Hz, 1H, CH-9), 2.33 (d,  $J = 13.5$  Hz, 1H, CH-16), 1.56 (s, 9H, tert-butyl  $CH_3 \times 3$ ), 1.36 (s, 3H,  $CH_3$ -27),

1.27 (s, 3H, CH<sub>3</sub>-25), 1.19 (s, 3H, CH<sub>3</sub>-26), 1.15 (s, 3H, CH<sub>3</sub>-29), 0.91 (s, 6H, CH<sub>3</sub>-23/24), 0.84 (s, 3H, CH<sub>3</sub>-28), 0.82(m, 1H, CH-5); <sup>13</sup>C NMR (101 MHz, Chloroform-*d*) δ 199.88 (C11), 174.10 (C30), 169.96 (acetyloxy C=O), 169.49 (C13), 154.51 (Boc C=O), 128.49 (C12), 81.01 (tert-butyl C), 80.23 (C3), 66.80 (morpholine C<sub>x2</sub>), 61.63 (C9), 59.75 ( acetoxy CH<sub>2</sub>), 54.93 (C5), 53.27 (morpholine C<sub>x2</sub>), 48.10 (C18), 45.26 (C14), 43.86 (piperazine C<sub>x2</sub>), 43.78 (C20), 43.26 ( C8/19), 38.71(C1/C4), 38.04 (piperazine C<sub>x2</sub>), 37.70 (C22), 36.88 (C10), 33.18 (C7), 32.70 (C17), 31.75 (C21), 28.40 (C29), 28.35 (tert-butyl CH<sub>3</sub>×3), 28.12 (C28), 27.05 (C23), 26.67 (C2), 26.38 (C15), 23.65 (C16), 23.09 (C27), 18.65 (C26), 17.35 (C6), 16.75 (C25), 16.40 (C24); HRMS (*m/z*): [M + H]<sup>+</sup> calcd. for C<sub>45</sub>H<sub>72</sub>N<sub>3</sub>O<sub>7</sub>: 766.5370, found: 766.5301.

*4-(3β-(2-Chloroacetoxy)-11-oxo-18β-olean-12-en-30-carbonyl)piperazine-1-carboxylic acid (15)*

Chloroacetic anhydride (1.37 g, 8.0 mmol) and K<sub>2</sub>CO<sub>3</sub> (2.76 g, 20.0 mmol) was heated at 130 °C in toluene for 20 min with a constant water separator. Then, compound **9** (0.64 g, 1.0 mmol) was added to the hot stirred suspension and the reaction mixture was stirred for another 1 h at 130 °C. On removal of the toluene, the H<sub>2</sub>O (50 ml) was added to the cool residue, After stirring for 1 h at room temperature, the white product was filtered, washed with cold H<sub>2</sub>O and dried.

A white solid; yield, 96.3%; m.p.205.7.0-206.6 °C; <sup>1</sup>H NMR (400 MHz, Chloroform-*d*) δ 5.66 (s, 1H, CH-12), 4.59 (dd, *J* = 11.8, 4.7 Hz, 1H, CH-3), 4.15 – 3.97 (m, 4H, piperazine CH<sub>2</sub>×2), 3.65 (s, 4H, piperazine CH<sub>2</sub>×2), 3.52 (s, 2H,

CH<sub>2</sub>-Cl), 2.85 – 2.75 (m, 1H, CH-1), 2.34 (s, 1H, CH-9), 2.28 (d, *J* = 12.1 Hz, 1H, CH-16), 1.34 (m, 3H, CH<sub>3</sub>-27), 1.22 (s, 3H, CH<sub>3</sub>-25), 1.14 (s, 3H, CH<sub>3</sub>-26), 1.10 (s, 3H, CH<sub>3</sub>-29), 0.88 (s, 6H, CH<sub>3</sub>-23/24), 0.80 (s, 3H, CH<sub>3</sub>-28), 0.78 (m, 1H, CH-5); <sup>13</sup>C NMR (101 MHz, chloroform-*d*) δ 199.83 (C11), 174.27 (C30), 169.43 (C13), 167.13 (chloroacetoxy C=O), 165.34 (-COOH), 128.51 (C12), 82.99 (C3), 61.62 (C9), 54.95 (C5), 48.06 (C18), 46.28 (C14), 45.26 (piperazine C), 43.93 (piperazine C), 43.83 (C20), 43.27 (C8), 42.21 (C19), 41.23 (C1), 40.65 (C-Cl), 38.67(C4), 38.22 (piperazine C×2), 37.67(C22), 36.88 (C10), 33.01 (C7), 32.68 (C17), 31.76 (C21), 28.39 (C29), 28.00 (C28), 27.03 (C23), 26.65 (C2), 26.35 (C15), 23.40 (C16), 23.11 (C27), 18.65 (C26), 17.31 (C6), 16.60 (C25), 16.40 (C24); HRMS (*m/z*): [M + H]<sup>+</sup> calcd. for C<sub>37</sub>H<sub>56</sub>ClN<sub>2</sub>O<sub>6</sub>: 659.3827, found: 659.3873.

*4-(3β-(2-Morpholinoacetoxy)-11-oxo-18β-olean-12-en-30-carbonyl)piperazine-1-carboxylic acid (16)*

Compound **15** (0.66 g, 1.0 mmol), morpholine (0.13 g, 1.5 mmol), K<sub>2</sub>CO<sub>3</sub> (0.69 g, 5.0 mmol) and a catalytic amount of I<sub>2</sub> in absolute ethanol (15 mL) was stirred under reflux for 12 h. The reaction mixture was evaporated under reduced pressure and the residue was dissolved in ethanol/H<sub>2</sub>O mixture and the white precipitate was collected by filtration.

A white solid; yield, 91.2%; m.p. 196.0-196.9 °C; <sup>1</sup>H NMR (400 MHz, Chloroform-*d*) δ 5.66 (d, *J* = 2.9 Hz, 1H, CH-12), 4.58 (dd, *J* = 11.7, 4.3 Hz, 1H, CH-3), 3.70 (t, *J* = 4.5 Hz, 4H, morpholine CH<sub>2</sub>×2), 3.60 (s, 8H, piperazine CH<sub>2</sub>×4), 3.26 –

3.16 (m, 2H, morpholinoacetoxy CH<sub>2</sub>), 2.86 – 2.74 (m, 1H, CH-1), 2.52 (d, *J* = 5.2 Hz, 4H, morpholine CH<sub>2</sub>×2), 2.33 (s, 1H, CH-9), 2.27 (d, *J* = 13.2 Hz, 1H, CH-16), 1.34 (s, 3H, CH<sub>3</sub>-27), 1.21 (s, 3H, CH<sub>3</sub>-25), 1.14 (s, 3H, CH<sub>3</sub>-26), 1.09 (s, 3H, CH<sub>3</sub>-29), 0.87 (s, 6H, CH<sub>3</sub>-23/24), 0.79 (s, 3H, CH<sub>3</sub>-28), 0.77 (m, 1H, CH-5); <sup>13</sup>C NMR (101 MHz, Chloroform-*d*) δ 199.84 (C11), 174.27 (C30), 169.52 (C13), 167.71 (acetyloxy C=O), 167.13 (COOH), 128.48 (C12), 82.98 (C3), 66.76 (morpholine C×2), 61.62 (C9), 61.45 (acetoxy CH<sub>2</sub>), 54.95 (C5), 53.44 (morpholine C×2), 48.10 (C18), 45.26 (C14), 43.91 (piperazine C×2), 43.79 (C20), 43.27 (C8), 41.86 (19), 41.23 (C1), 38.66 (C4), 38.22 (piperazine C×2), 37.68 (C22), 36.87 (C10), 33.09 (C7), 32.67 (C17), 31.76 (C21), 28.40 (C29), 28.00 (C28), 27.04 (C23), 26.66 (C2), 26.36 (C15), 23.40 (C16), 23.11 (C27), 18.64 (C26), 17.31 (C6), 16.60 (C25), 16.40 (C24); HRMS (Methanol as solvent, *m/z*): [M<sub>Methyl ester</sub> + H]<sup>+</sup> calcd. for C<sub>42</sub>H<sub>66</sub>N<sub>3</sub>O<sub>7</sub>: 724.4901, found: 724.9726.

***3β-(2-Morpholinoacetoxy)-11-oxo-18β-olean-12-en-30-carbonyl piperazine (17)***

Compound **14** (0.77g, 1.0 mmol) or compound **16** (0.71 g, 1.0 mmol) was dissolved in CH<sub>2</sub>Cl<sub>2</sub> (10 mL) at 0 °C under stirring. Trifluoroacetic acid (5 mL) was added, and the reaction was stirred at 0 °C for 3 h. After reaction, the mixture was made basic with a saturated Na<sub>2</sub>CO<sub>3</sub> solution. This mixture was extracted with CH<sub>2</sub>Cl<sub>2</sub>, dried over Na<sub>2</sub>SO<sub>4</sub>, and concentrated to give the desired product. A white solid; yield, 91.7%; m.p. 215.9-216.7 °C; <sup>1</sup>H NMR (400 MHz, Chloroform-*d*) δ 5.70 (t, *J* = 3.2 Hz, 1H, CH-12), 4.60 (dt, *J* = 11.2, 4.7 Hz, 1H, CH-3), 3.76 (dt, *J* = 6.7, 3.3 Hz, 4H, morpholine CH<sub>2</sub>×2), 3.62 (t, *J* = 5.5 Hz, 4H, piperazine



CH<sub>2</sub>×2), 3.21 (dd, *J* = 4.5, 2.4 Hz, 2H, morpholinoacetoxy CH<sub>2</sub>), 2.91 – 2.84 (m, 4H, piperazine CH<sub>2</sub>×2), 2.81 (d, *J* = 13.0 Hz, 1H, CH-1), 2.60 (t, *J* = 5.2 Hz, 4H, morpholine CH<sub>2</sub>×2), 2.36 (t, *J* = 3.3 Hz, 1H, CH-9), 2.30 (d, *J* = 13.5 Hz, 1H, CH-16), 1.36 (s, 3H, CH<sub>3</sub>-27), 1.23 (s, 3H, CH<sub>3</sub>-25), 1.16 (s, 3H, CH<sub>3</sub>-26), 1.12 (s, 3H, CH<sub>3</sub>-29), 0.88 (s, 6H, CH<sub>3</sub>-23/24), 0.82 (s, 3H, CH<sub>3</sub>-28), 0.79 (s, 1H, CH-5); <sup>13</sup>C NMR (101 MHz, cdcl<sub>3</sub>) δ 199.95 (C11), 173.84 (C30), 170.01 (acetyloxy C=O), 169.73 (C13), 128.47 (C12), 81.03 (C3), 66.83 (morpholine C×2), 61.65 (C9), 59.78 (morpholinoacetoxy CH<sub>2</sub>), 54.95 (C5), 53.30 (morpholine C×2), 48.23(C18), 46.30 (piperazine C×2), 45.28 (C14), 43.79 (C20), 43.75 (C8), 43.28 (piperazine C×2), 38.75 (C19), 38.06 (C1/4), 37.75 (C22), 36.91 (C10), 33.40 (C7), 32.71 (C17), 31.77 (C21), 28.43 (C29), 28.13 (C28), 27.05 (C23), 26.71 (C2), 26.44 (C15), 23.66 (C16), 23.11 (C27), 18.67 (C26), 17.37 (C6), 16.77 (C25), 16.42 (C24) ; HRMS (*m/z*): [M + H]<sup>+</sup> calcd. for C<sub>40</sub>H<sub>64</sub>N<sub>3</sub>O<sub>5</sub>: 666.4846, found: 666.4795.

*3β-Acetoxy-30-(4-(3-fluorobenzoyl)-1-piperazinyl)-olean-12-ene-11,30-dione*  
**(18)**

Compound **4** (0.58 g, 1.0 mmol) and triethylamine (0.13 g, 1.2 mmol) were dissolved in CH<sub>2</sub>Cl<sub>2</sub> (20 mL) at 0 °C under stirring. 3-fluorobenzoyl chloride (0.158 g, 1.0 mmol) was added, and the reaction was stirred at room temperature for 3 h. After reaction, the mixture was washed twice with water. The organic layer was dried over anhydrous Na<sub>2</sub>SO<sub>4</sub>, filtered, and concentrated under reduced pressure. The crude product was then chromatographed on silica

(DCM-methanol, 20:1).

A white solid; yield, 88.2%; m.p. 234.1-225.9 °C; <sup>1</sup>H NMR (400 MHz, Chloroform-*d*) δ 7.41 (td, *J* = 7.8, 5.6 Hz, 1H, phenyl), 7.23 – 7.09 (m, 3H, phenyl), 5.68 (s, 1H, CH-12), 4.52 (dd, *J* = 11.6, 4.7 Hz, 1H, CH-3), 3.71 – 3.45 (m, 8H, morpholine CH<sub>2</sub>×4), 2.79 (dt, *J* = 13.5, 3.6 Hz, 1H, CH-1), 2.35 (s, 1H, CH-9), 2.32 – 2.23 (m, 1H, CH-16), 2.05 (s, 3H, acetyloxy CH<sub>3</sub>), 1.35 (s, 3H, CH<sub>3</sub>-27), 1.25 (s, 3H, CH<sub>3</sub>-25), 1.24 (s, 3H, CH<sub>3</sub>-26), 1.16 (s, 3H, CH<sub>3</sub>-29), 1.12 (s, 3H, CH<sub>3</sub>-23), 0.88 (s, 3H, CH<sub>3</sub>-24), 0.82 (s, 3H, CH<sub>3</sub>-28), 0.79 (m, 1H, CH-5); <sup>13</sup>C NMR (101 MHz, Chloroform-*d*) δ 199.92 (C11), 174.25 (C30) – acetyloxy C=O), 169.31 (C13), 169.06 (benzoyl), 169.04 (benzoyl), 163.78 (C-F), 161.31 (C-F), 137.17 (phenyl), 137.10 (phenyl), 130.52 (phenyl), 130.44 (phenyl), 128.53 (C12), 122.73 (phenyl), 122.70 (phenyl), 117.21 (phenyl), 117.01 (phenyl), 114.56 (phenyl), 114.33 (phenyl), 80.56 (C3), 61.69 (C9), 55.00 (C5), – (C18), 45.28 (C14), 43.91 (C20), 43.70 (morpholine), 43.26 (C8), 38.78 (C19), 38.02 (C1/4), 37.67 (C22), 36.91 (C10) – (C7), 32.72 (C17), 31.78 (C21), 28.39 (C29), 28.02 (C28), 27.04 (C23), 26.66 (C2), 26.37 (C15), 23.54 (C16), 23.08 (C27), 21.32 (acetoxo CH<sub>3</sub>), 18.65 (C26), 17.35 (C6), 16.67 (C25), 16.41 (C24); HRMS (*m/z*): [M + H]<sup>+</sup> calcd. for C<sub>43</sub>H<sub>60</sub>FN<sub>2</sub>O<sub>5</sub>: 703.4486, found: 703.4486.

*Crystal structure analysis of compound (18)*

The single crystal X-ray diffraction data of compound **18** was collected on a Bruker SMART APEX II CCD detector employing graphite monochromated Cu K $\alpha$  radiation ( $\lambda = 1.54178 \text{ \AA}$ ) at 273 (2) K. The structures were solved by direct methods using SHELXL-97 and refined using full-matrix least-squares calculation on F<sup>2</sup> using SHELXL-97. All non-hydrogen atoms were refined anisotropically. The hydrogen atom positions were geometrically idealized and allowed to ride on their parent atoms. Crystallographic data for compound **18** has been deposited at the Cambridge Crystallographic Data Centre. CCDC 1904891. These data can be obtained free of charge from The Cambridge Crystallographic Data Centre via [www.ccdc.cam.ac.uk/data\\_request/cif](http://www.ccdc.cam.ac.uk/data_request/cif).

*3β-Acetoxy-11-oxo-18β-olean-12-en-30-oic acid (2)*

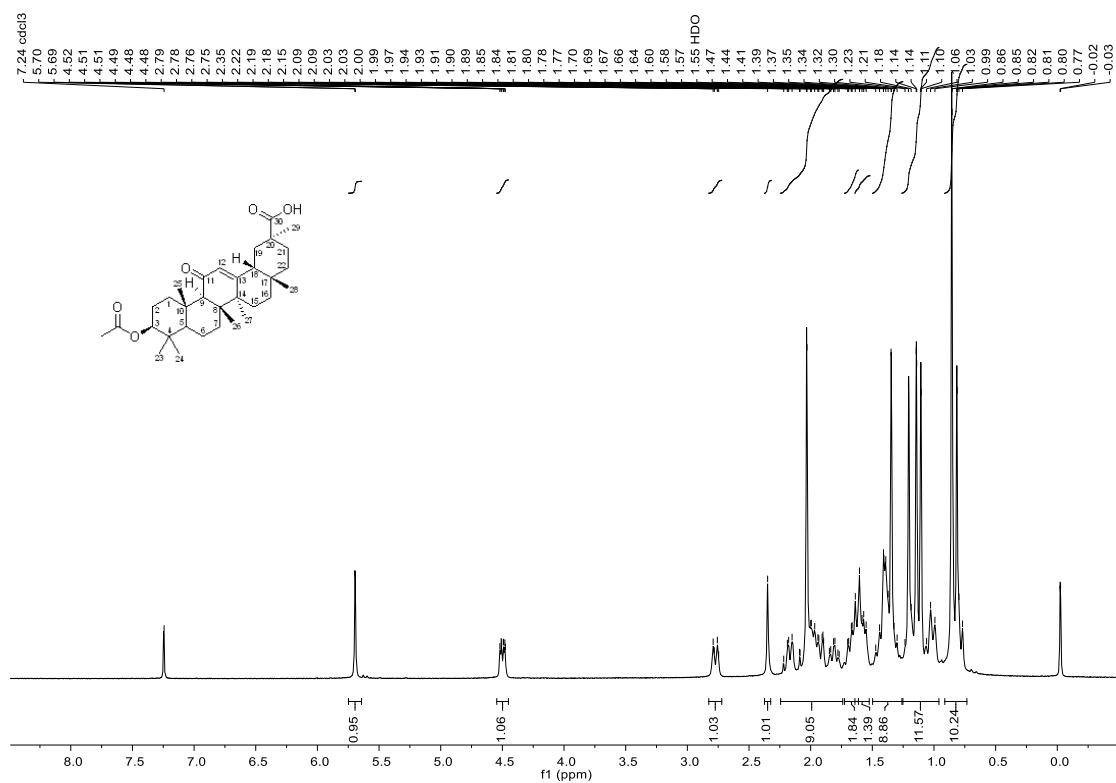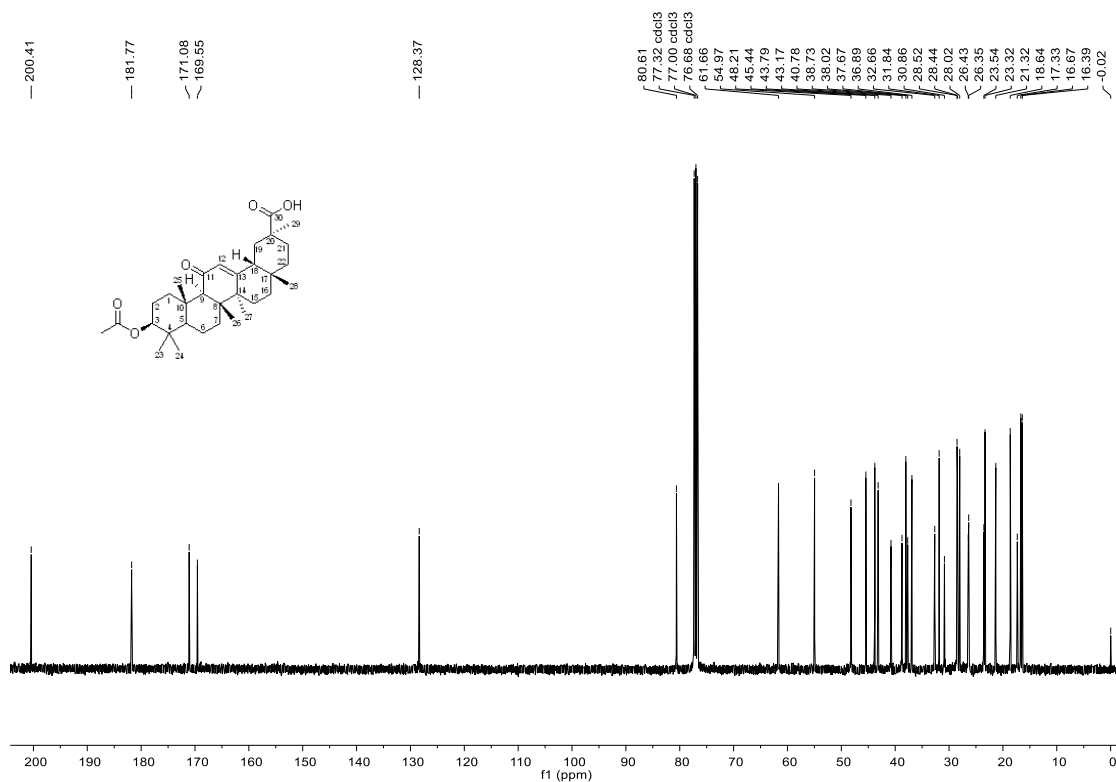

GA3-1 #222 RT: 1.83 AV: 1 NL: 1.13E7  
F: FTMS + p ESI Full ms [100.00-1000.00]

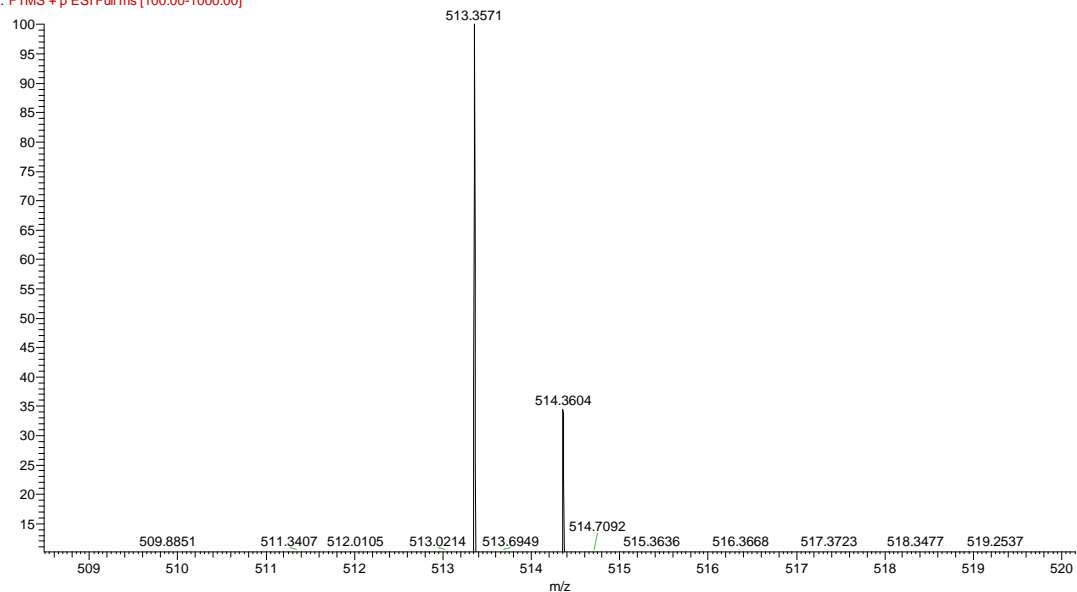

*tert*-Butyl 4-(3 $\beta$ -acetoxy-11-oxo-18 $\beta$ -olean-12-en-30-carbonyl)piperazine-1-carboxylate (**8**)

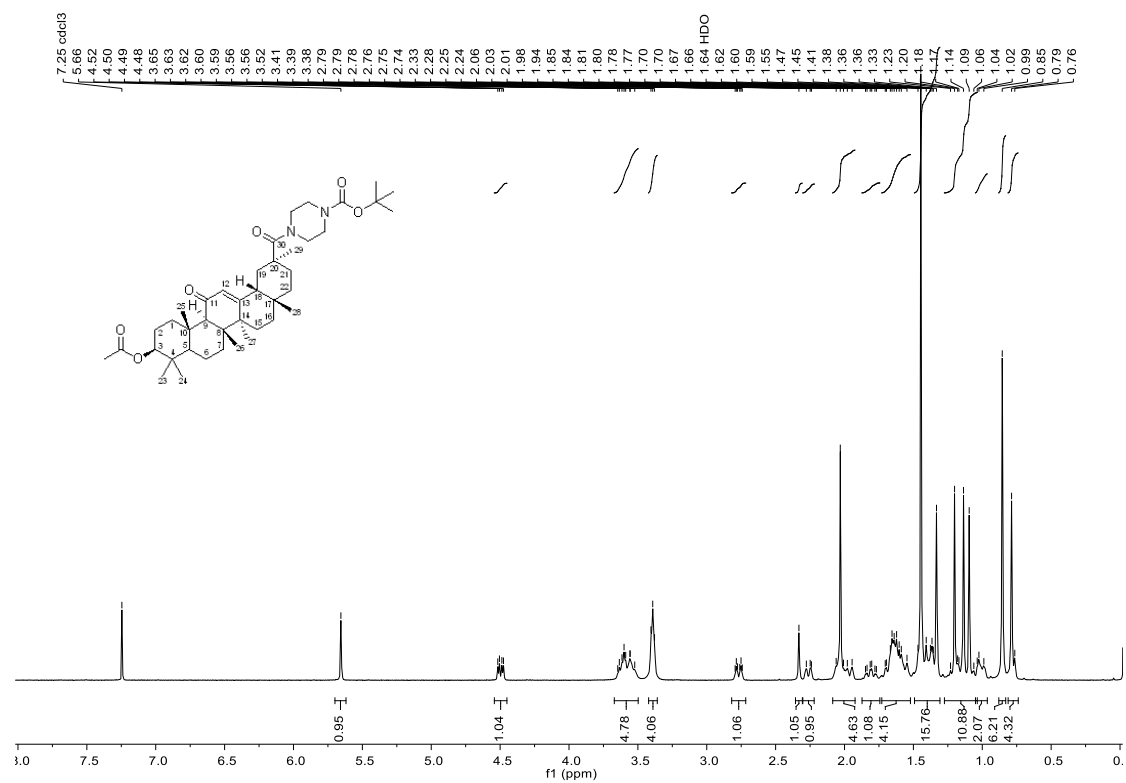

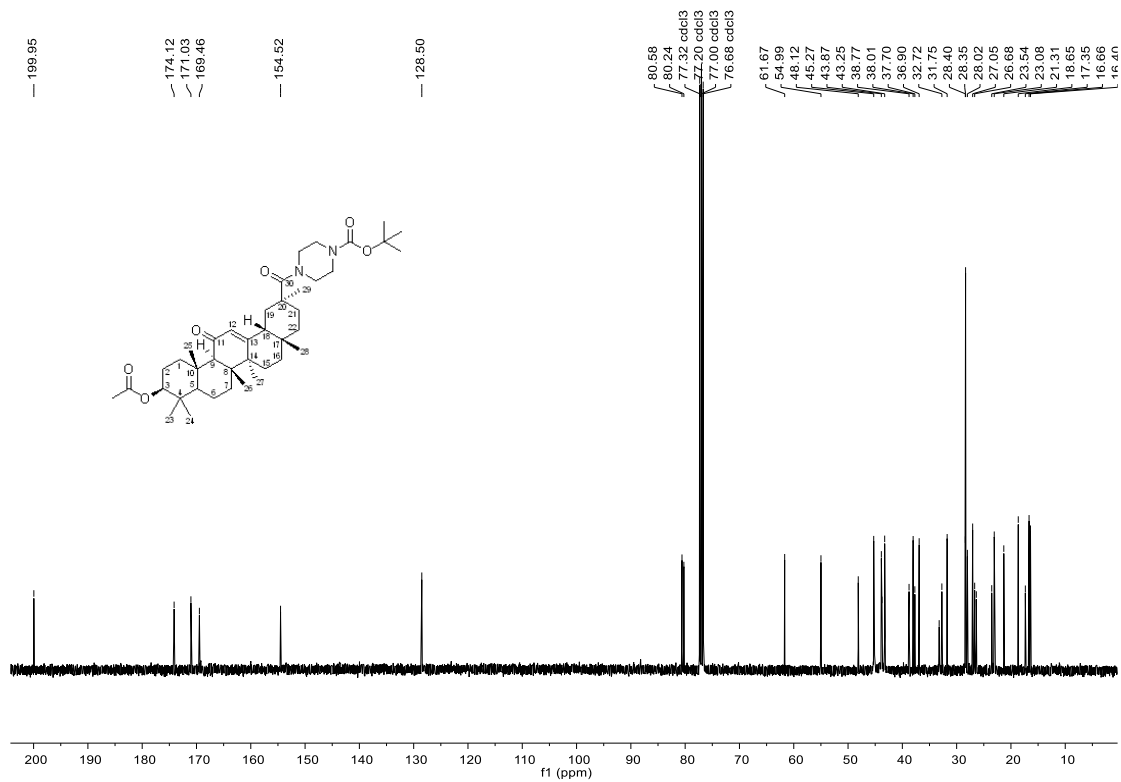

GA3 #229 RT: 1.88 AV: 1 NL: 1.26E7  
 F: FTMS + p ESI Full ms [100.00-1000.00]

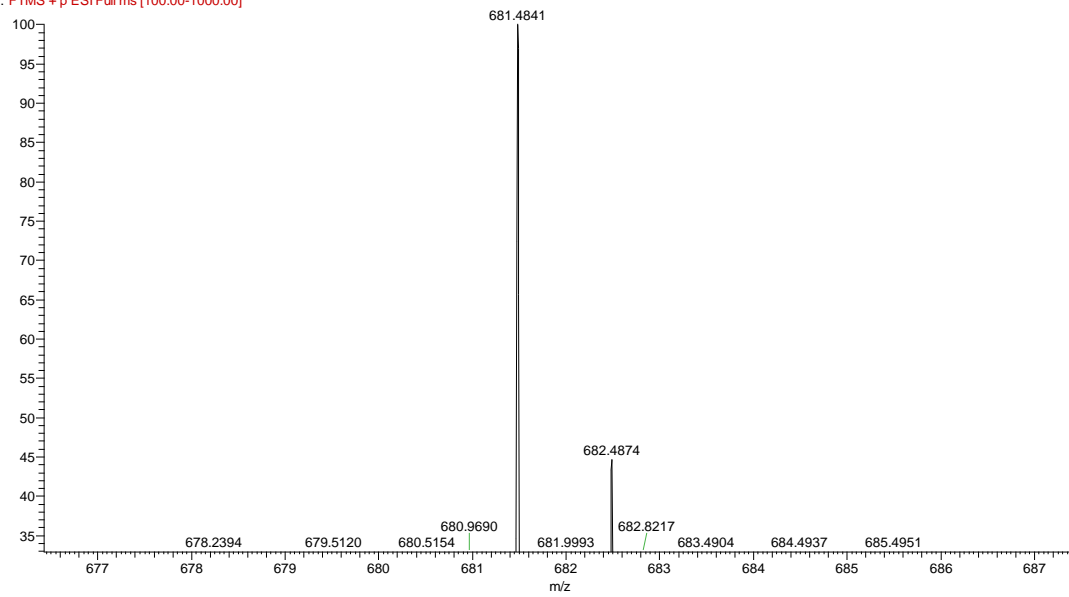

*3β-(2-Chloroacetoxy)-11-oxo-18β-olean-12-en-30-oic acid (12)*

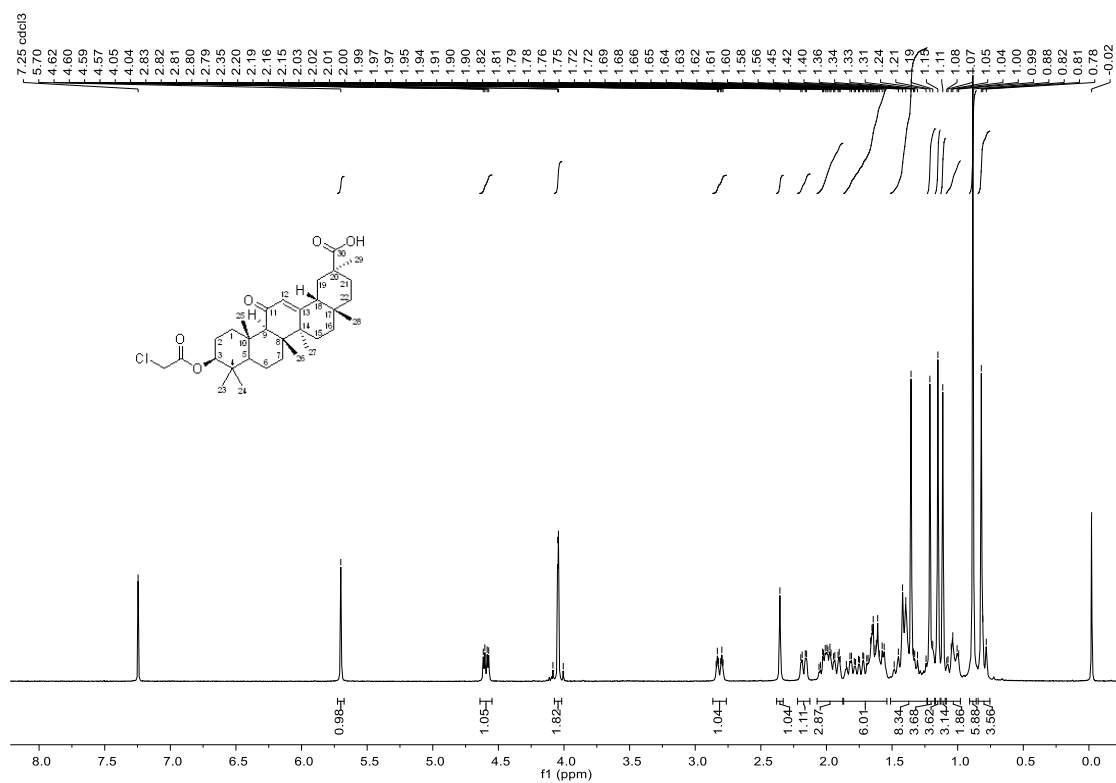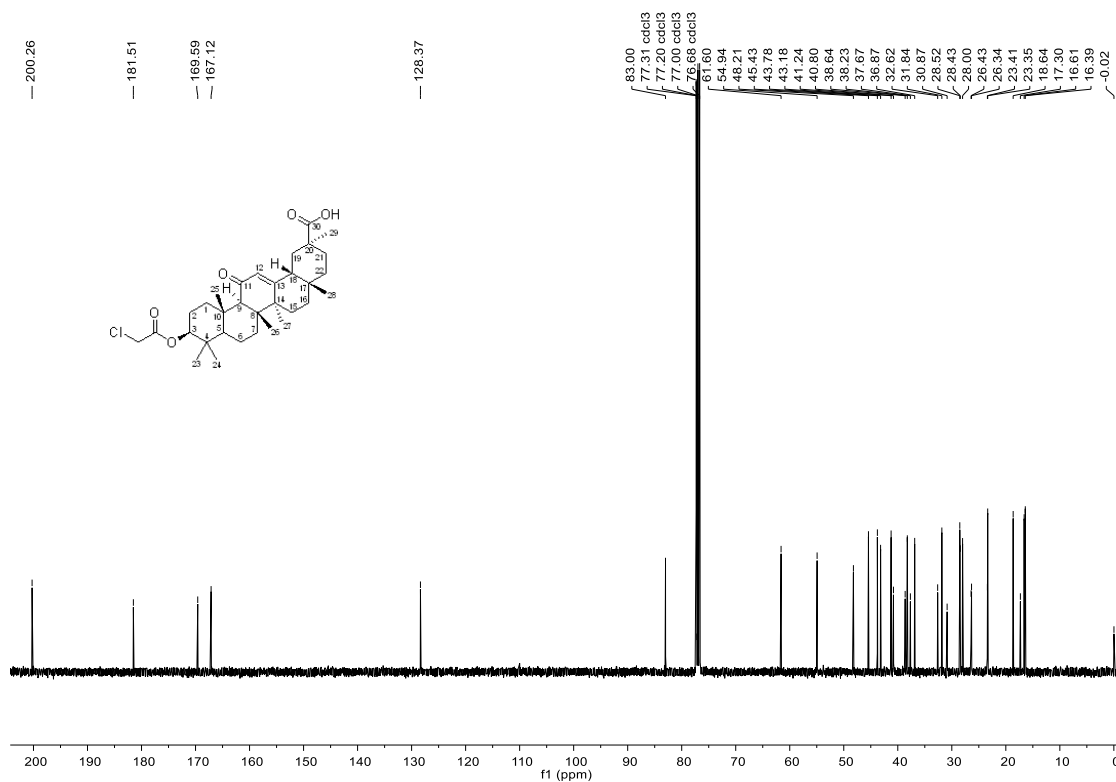

GA6 #192 RT: 1.59 AV: 1 NL: 6.88E6  
F: FTMS + p ESI Full ms [100.00-1000.00]

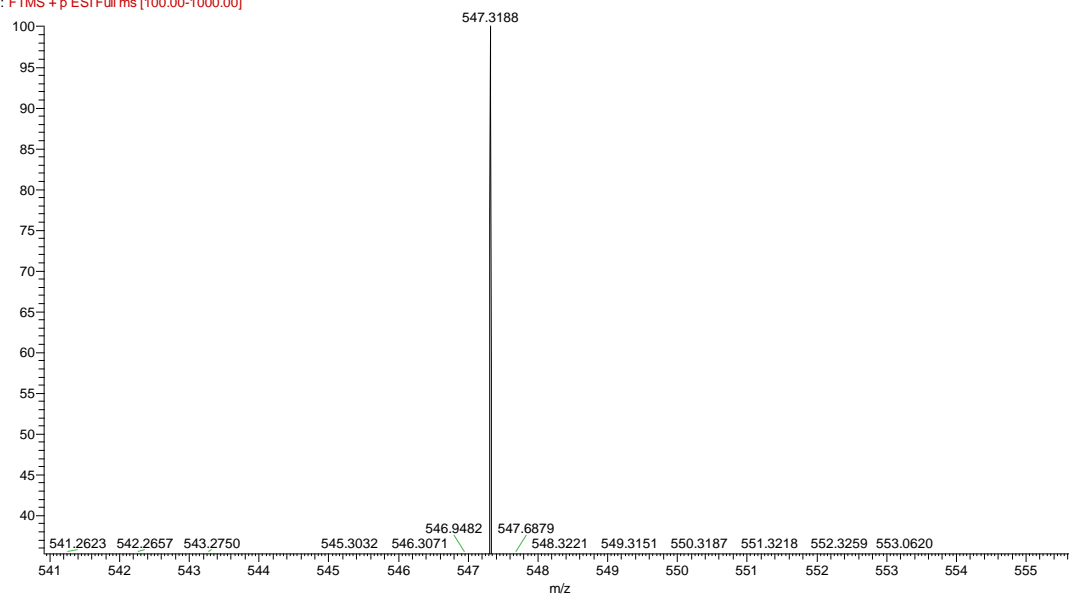

*1H*-Benzo[d][1,2,3]triazol-1-yl-3 $\beta$ -acetoxy-11-oxo-olean-12-en-30-oate (**6**)

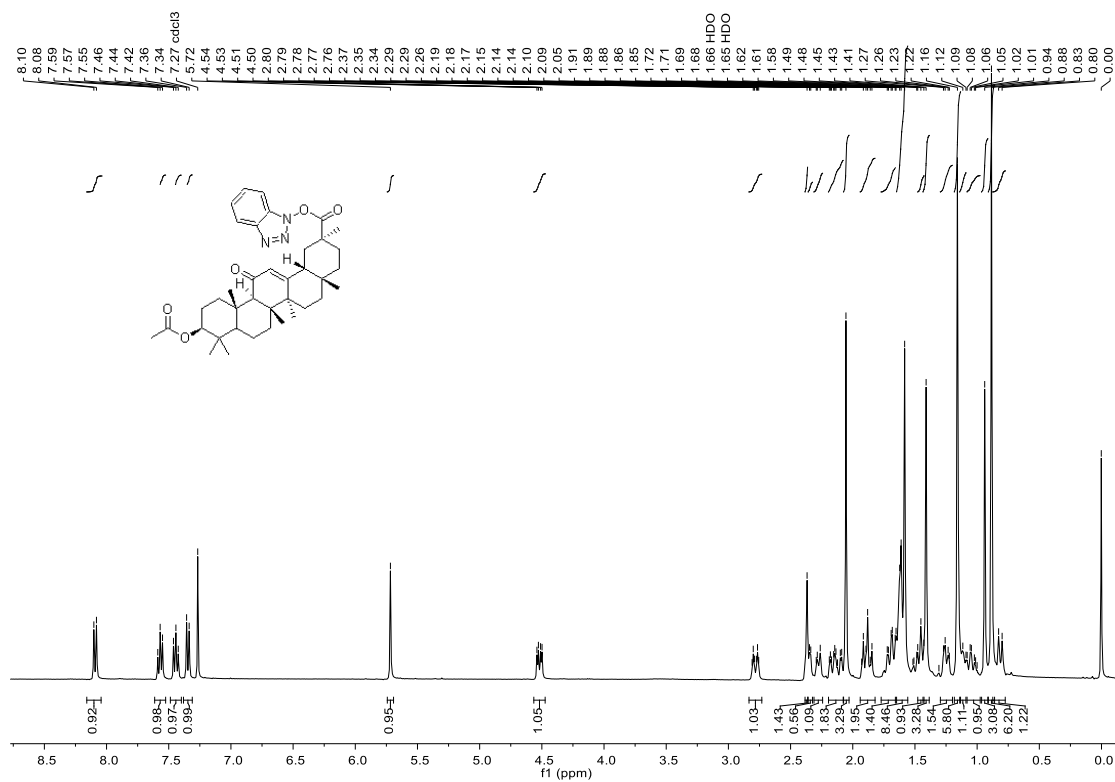



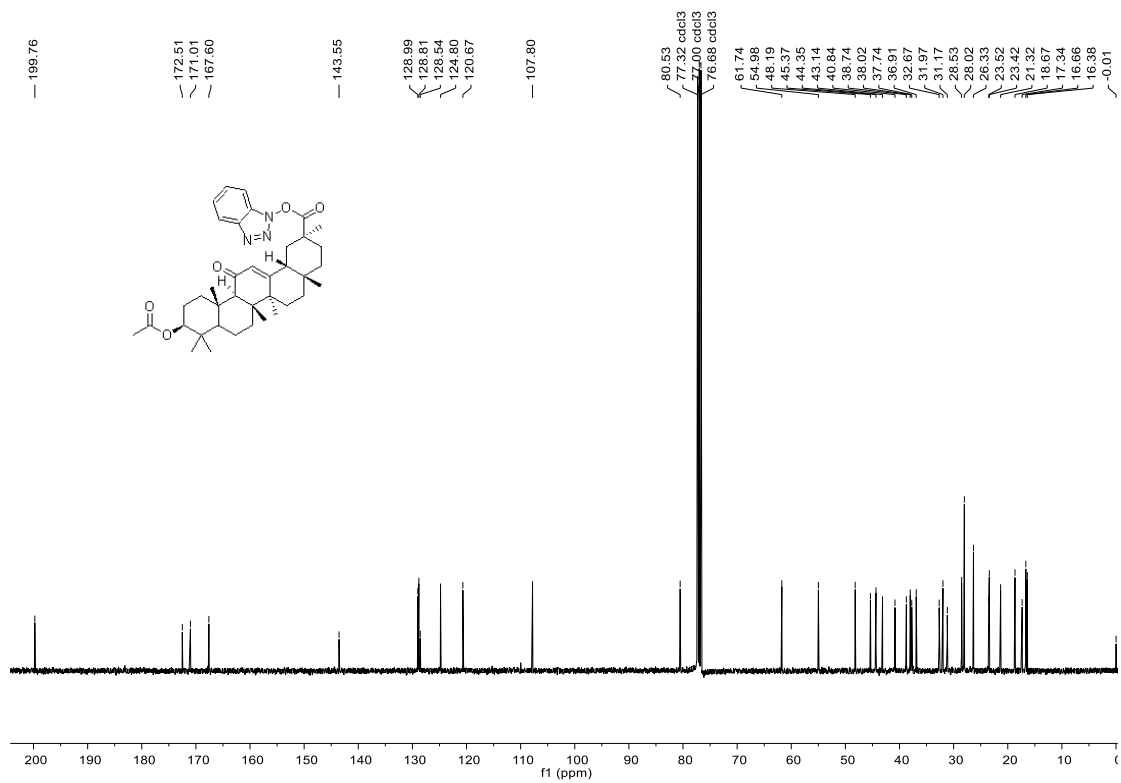

GA3-2 #220 RT: 1.82 AV: 1 NL: 4.41E6  
 F: FTMS + p ESI Full ms [100.00-1000.00]

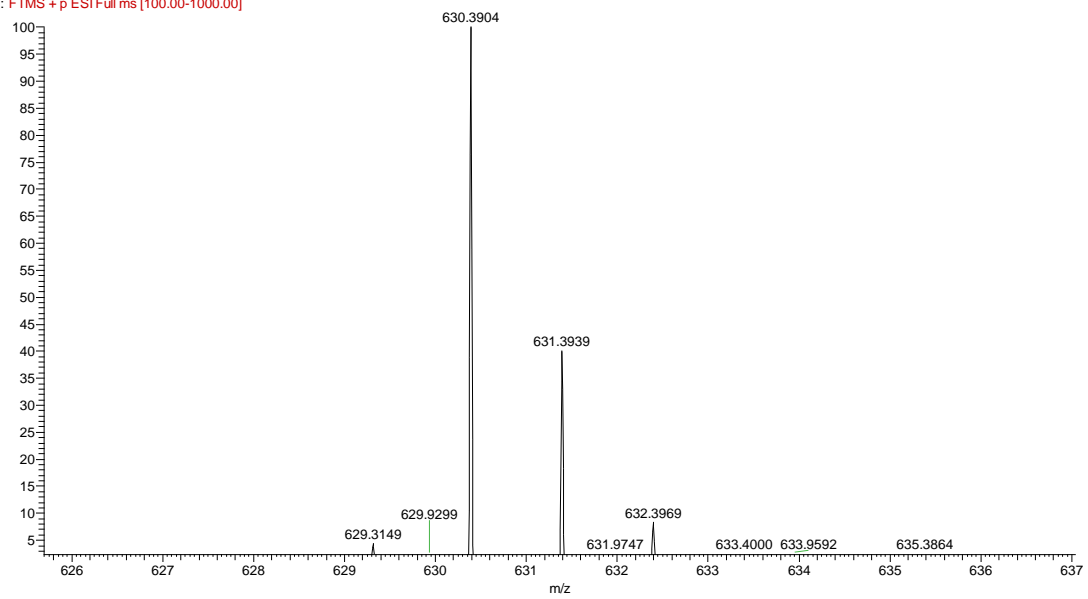



GA1-1 #216 RT: 1.77 AV: 1 NL: 1.30E7  
F: FTMS + p ESI Full ms [100.00-1000.00]

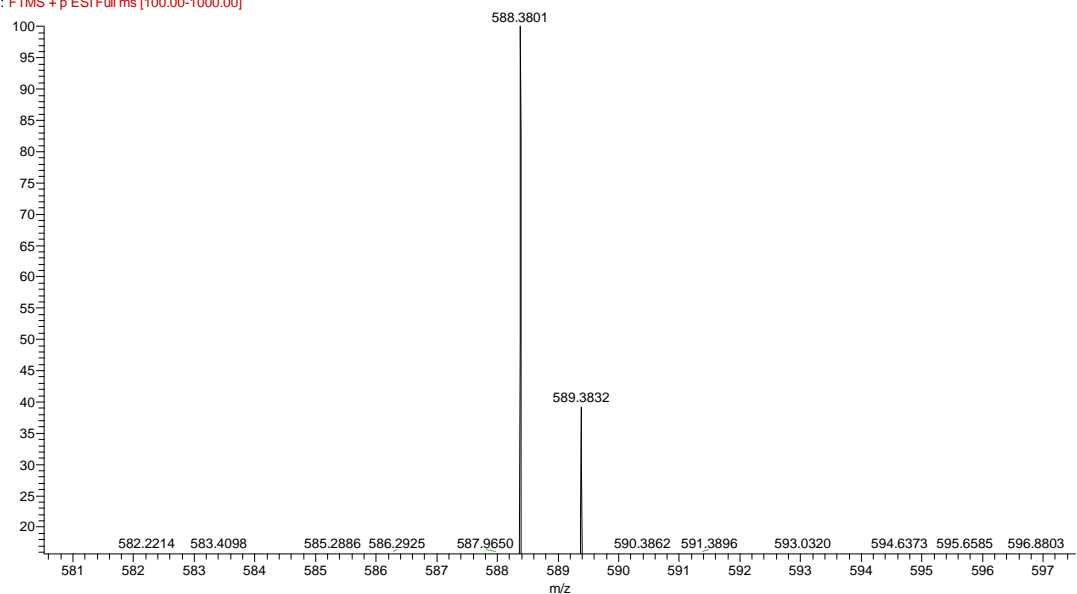

*tert*-Butyl 4-(3 $\beta$ -hydroxyl-11-oxo-18 $\beta$ -olean-12-en-30-carbonyl)piperazine-1-carboxylate (**9**)

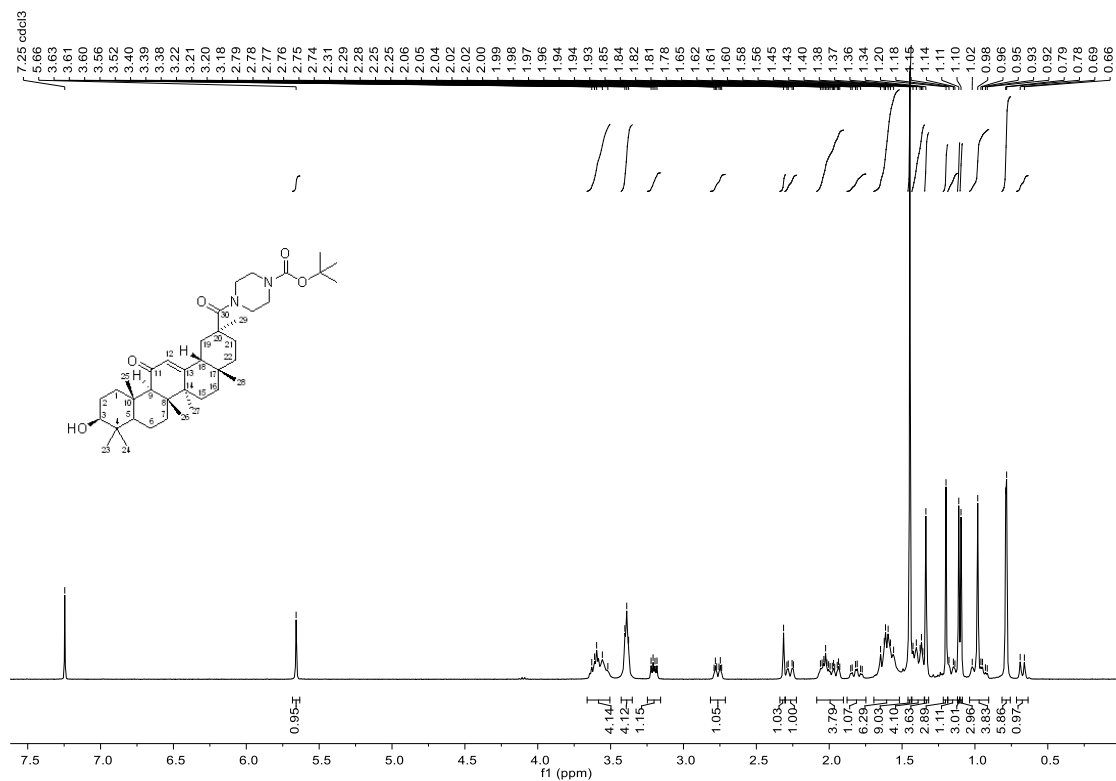

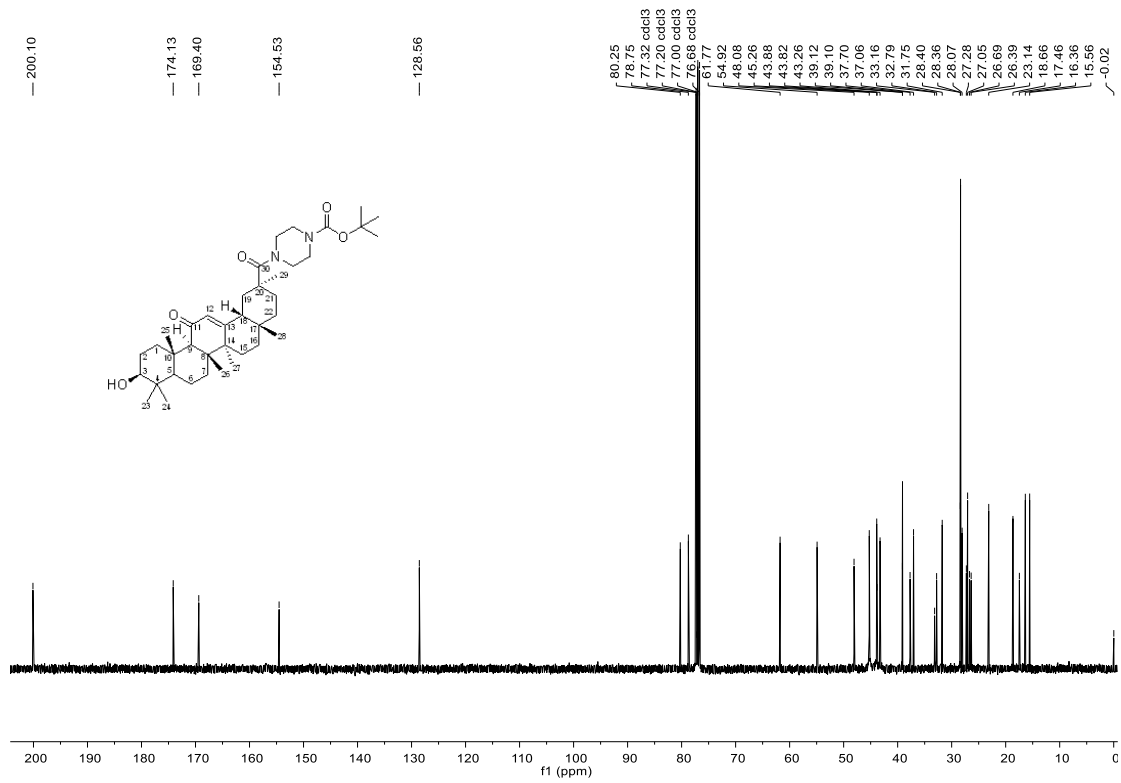

GA1 #198 RT: 1.64 AV: 1 NL: 7.10E6  
 F: FTMS + p ESI Full ms [100.00-1000.00]

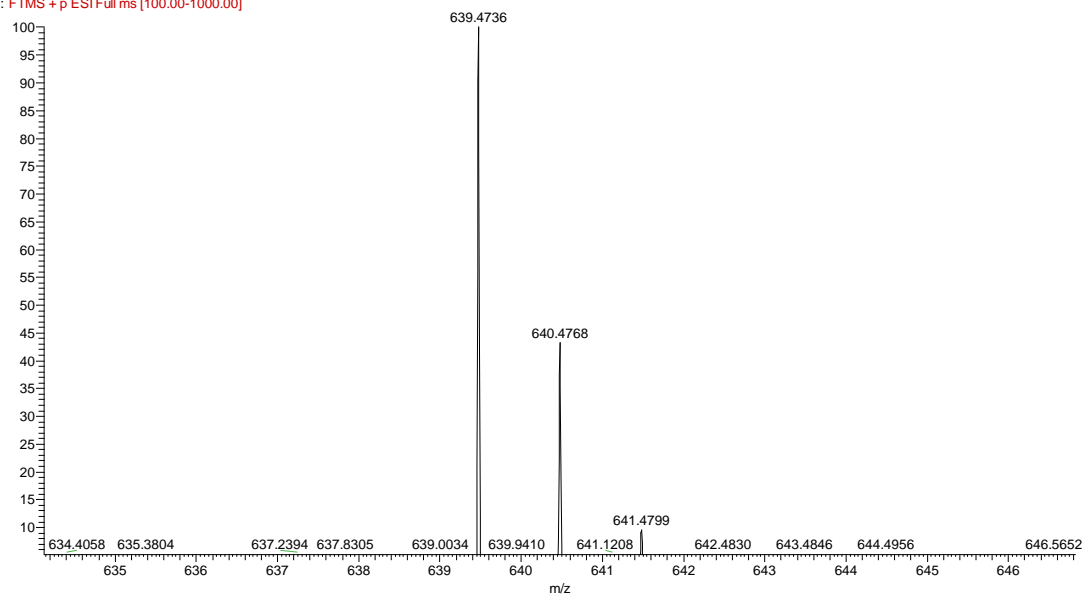

*tert*-Butyl 4-(3β-(2-morpholinoacetoxy)-11-oxo-18β-olean-12-en-30-carbonyl)piperazine-1-carboxylate (**14**)

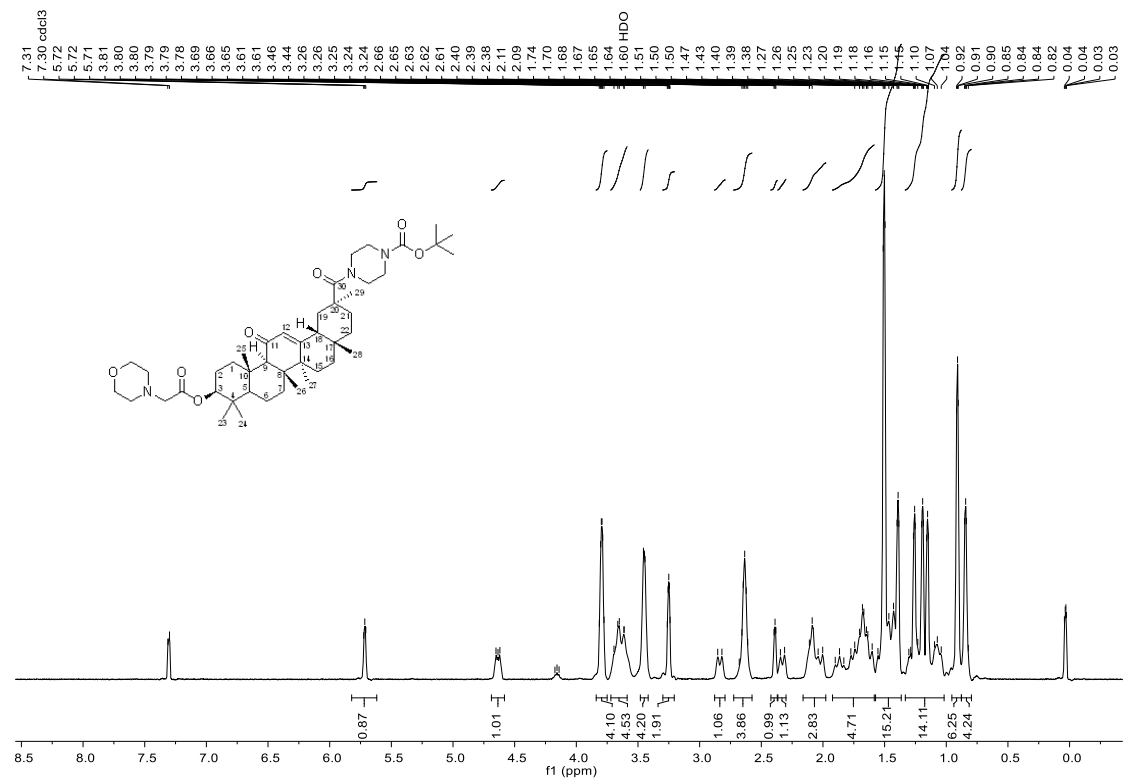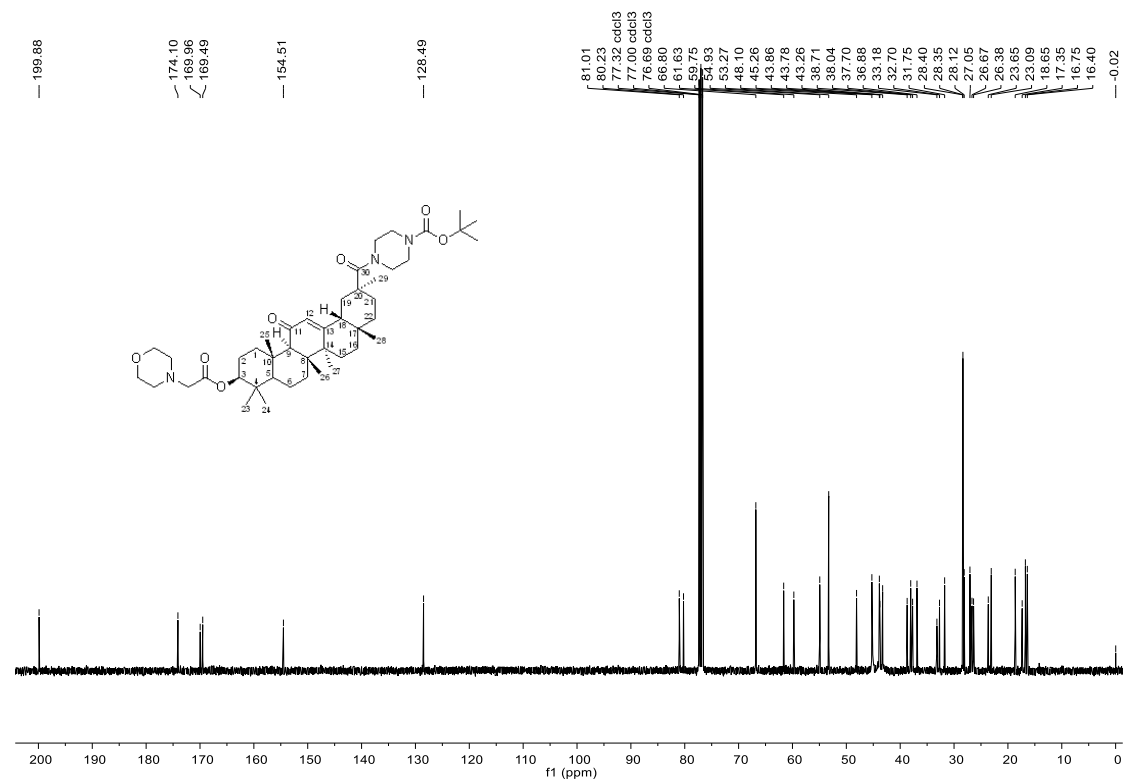

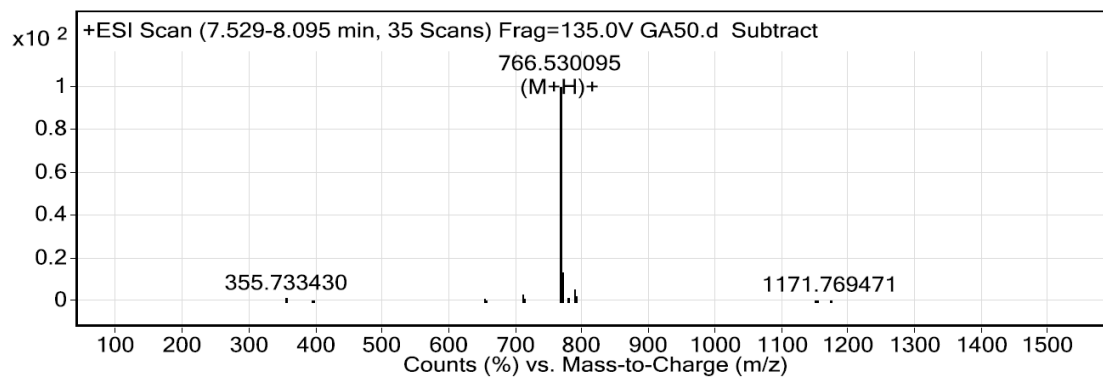

*N*-(2-Chloroacetyl)piperazinyl 3 $\beta$ -(2-chloroacetoxy)-11-oxo-18 $\beta$ -olean-12-en-30-amide (**11**)

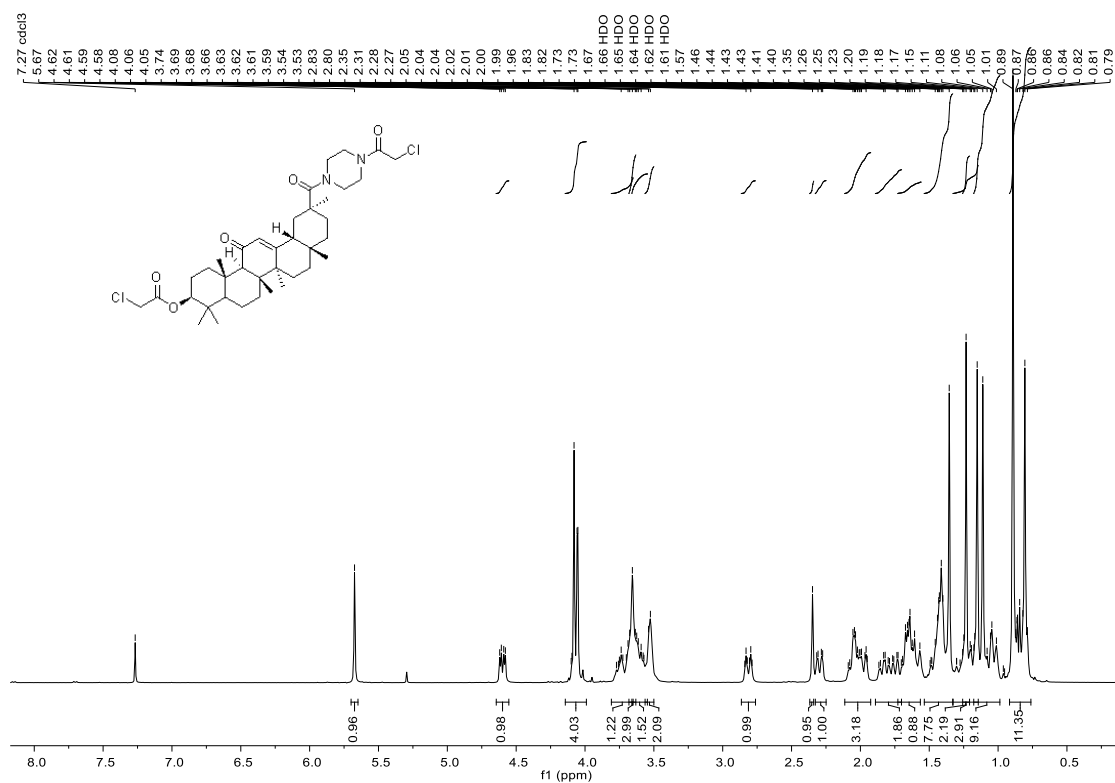

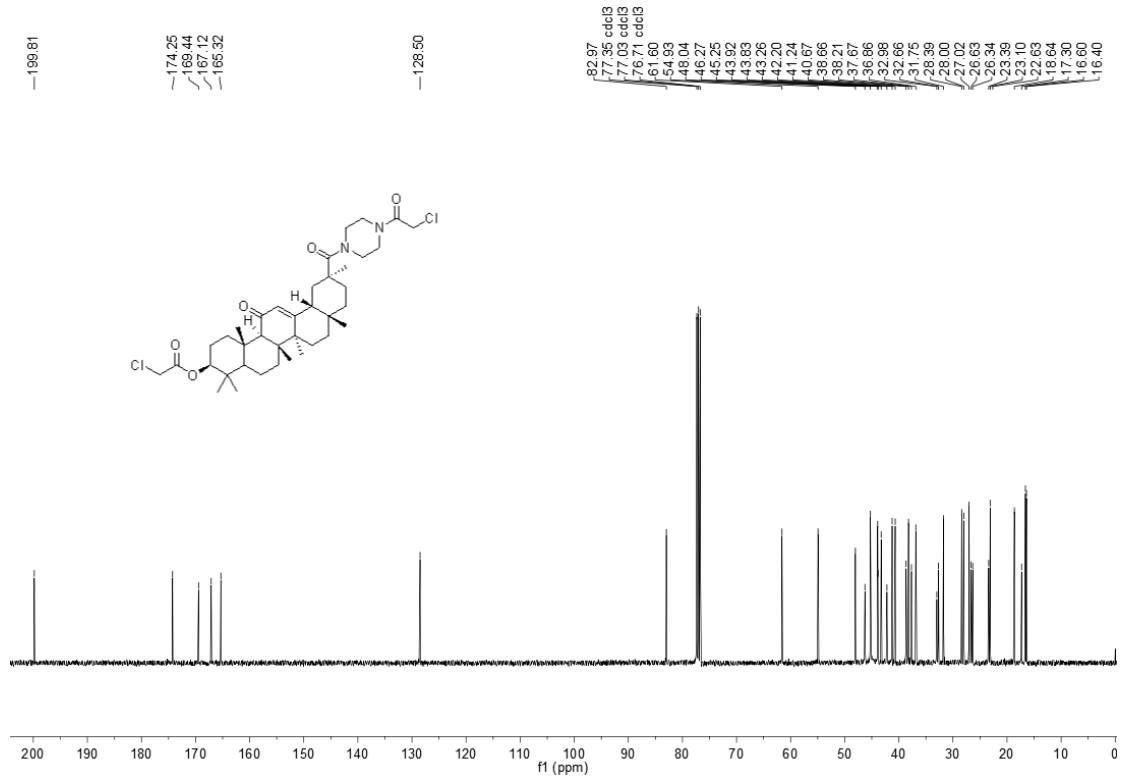

GA2 #211 RT: 1.75 AV: 1 NL: 1.06E7  
 F: FTMS + p ESI Full ms [100.00-1000.00]

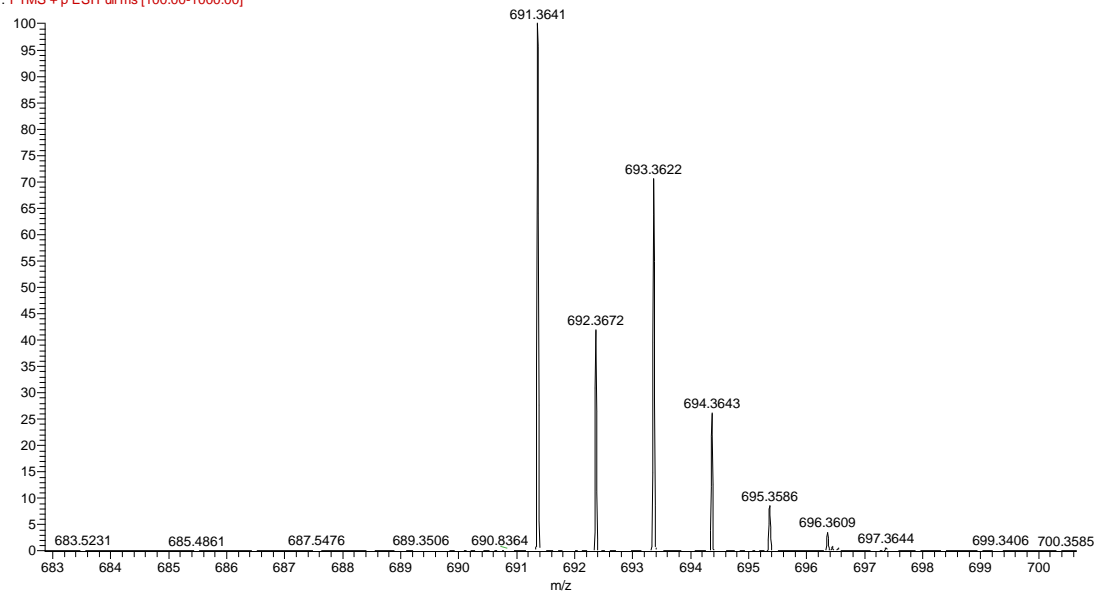

4-(3 $\beta$ -(2-Chloroacetoxy)-11-oxo-18 $\beta$ -olean-12-en-30-carbonyl)piperazine-1-carboxylic acid (**15**)

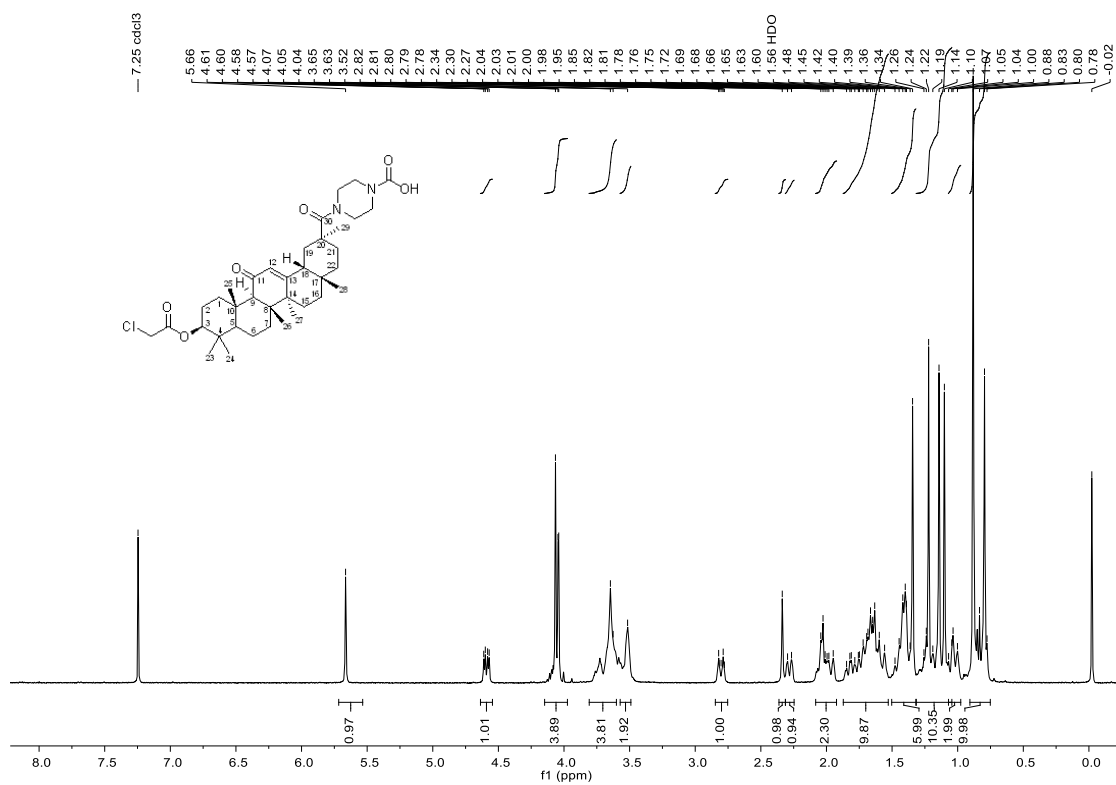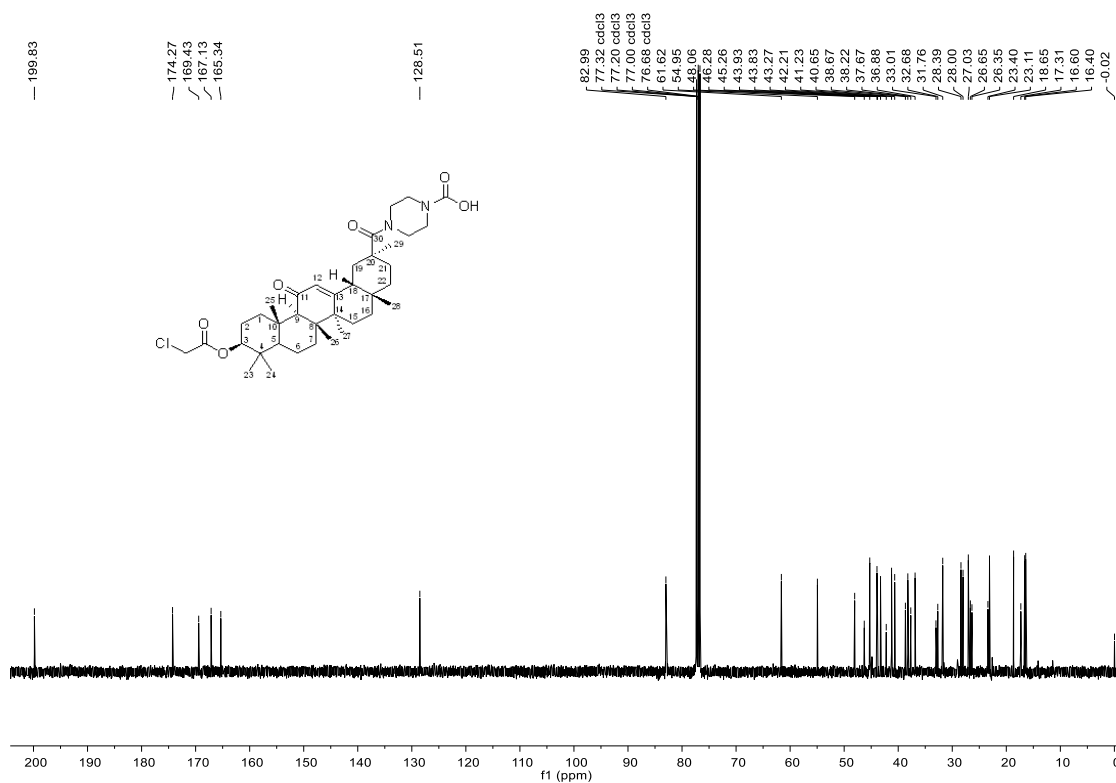



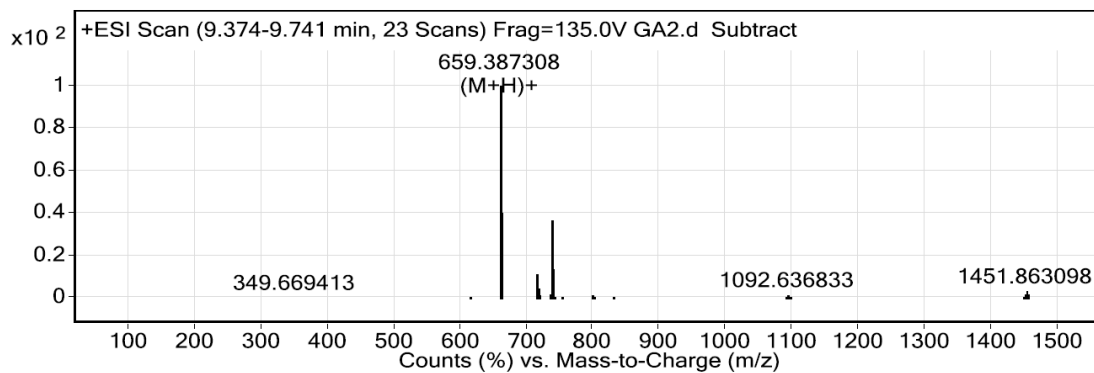

*3β-(2-Morpholinoacetoxy)-11-oxo-olean-12-ene-30-oic acid (13)*

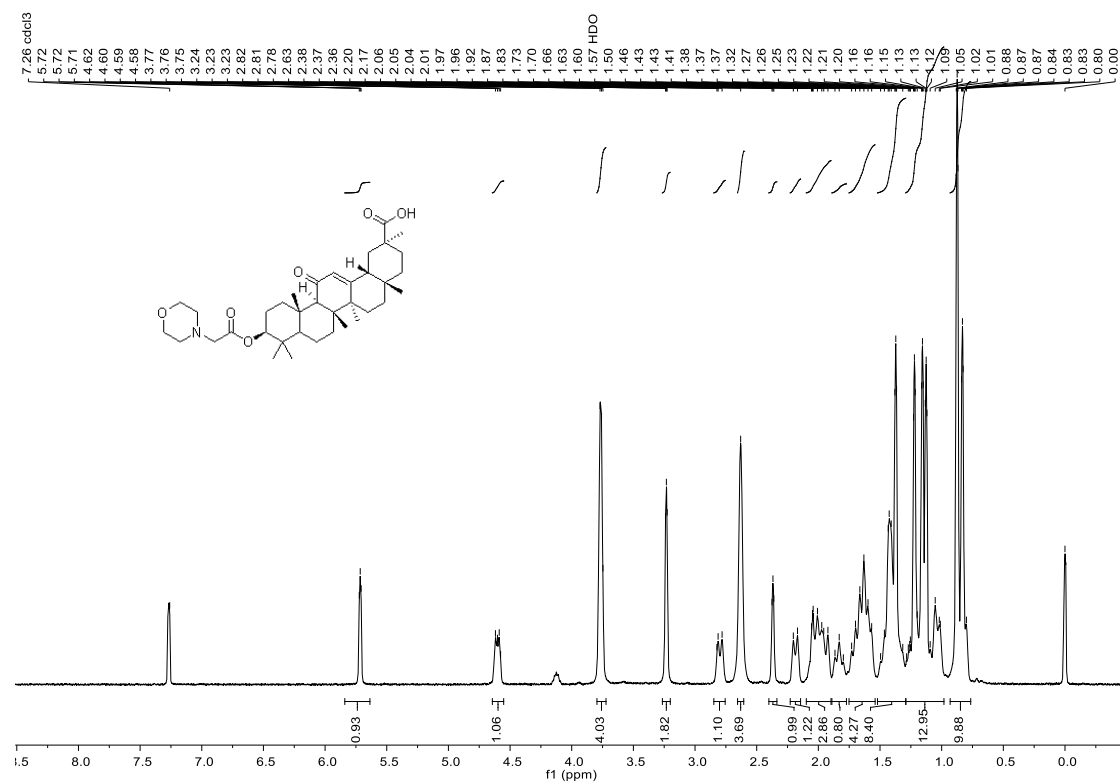

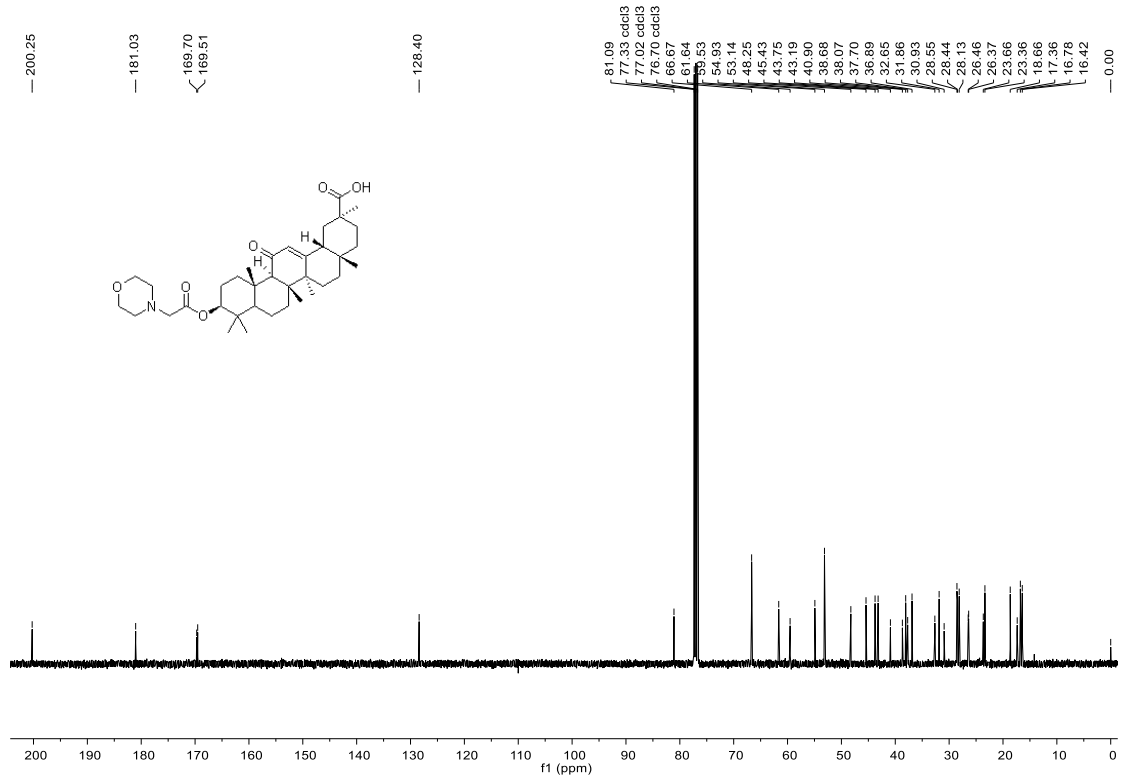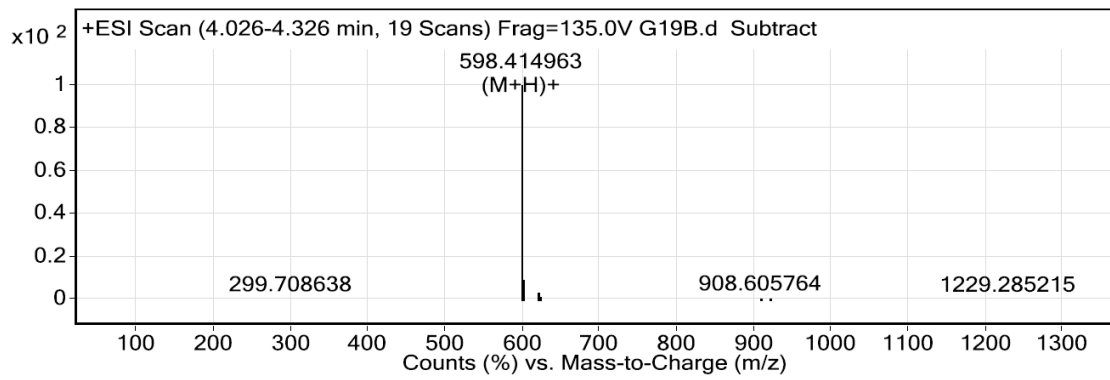

4-(3 $\beta$ -(2-Morpholinoacetoxy)-11-oxo-18 $\beta$ -olean-12-en-30-carbonyl)piperazine-1-carboxylic acid (**16**)

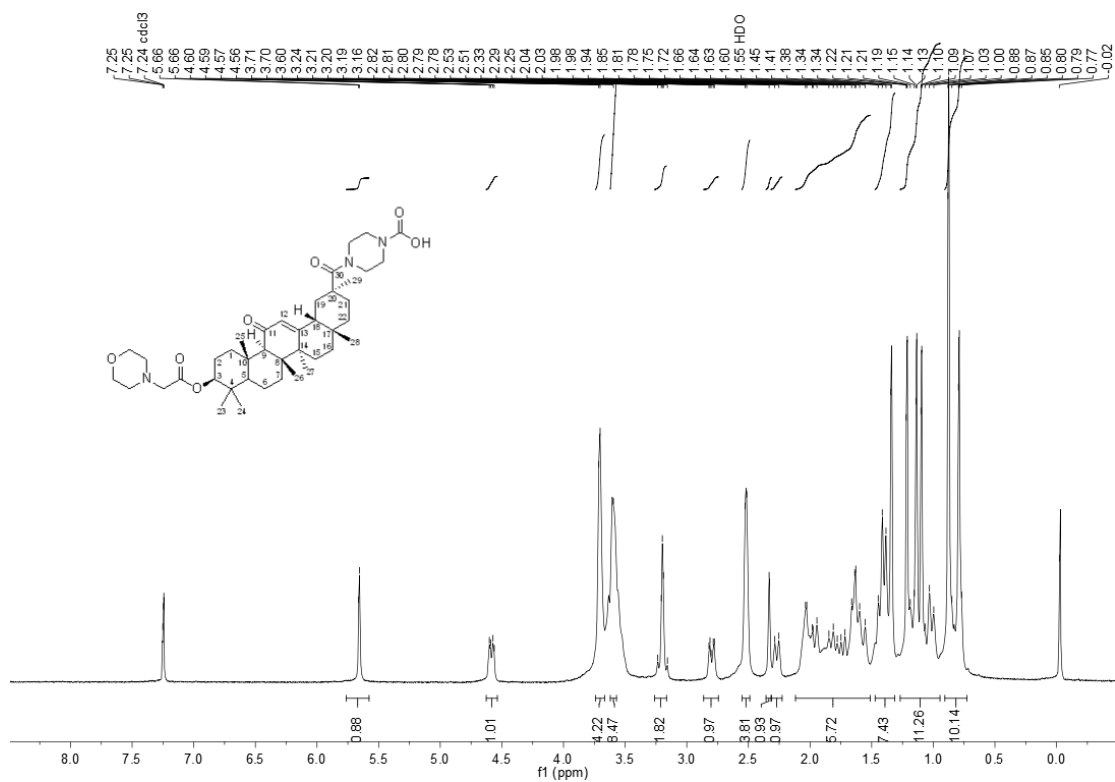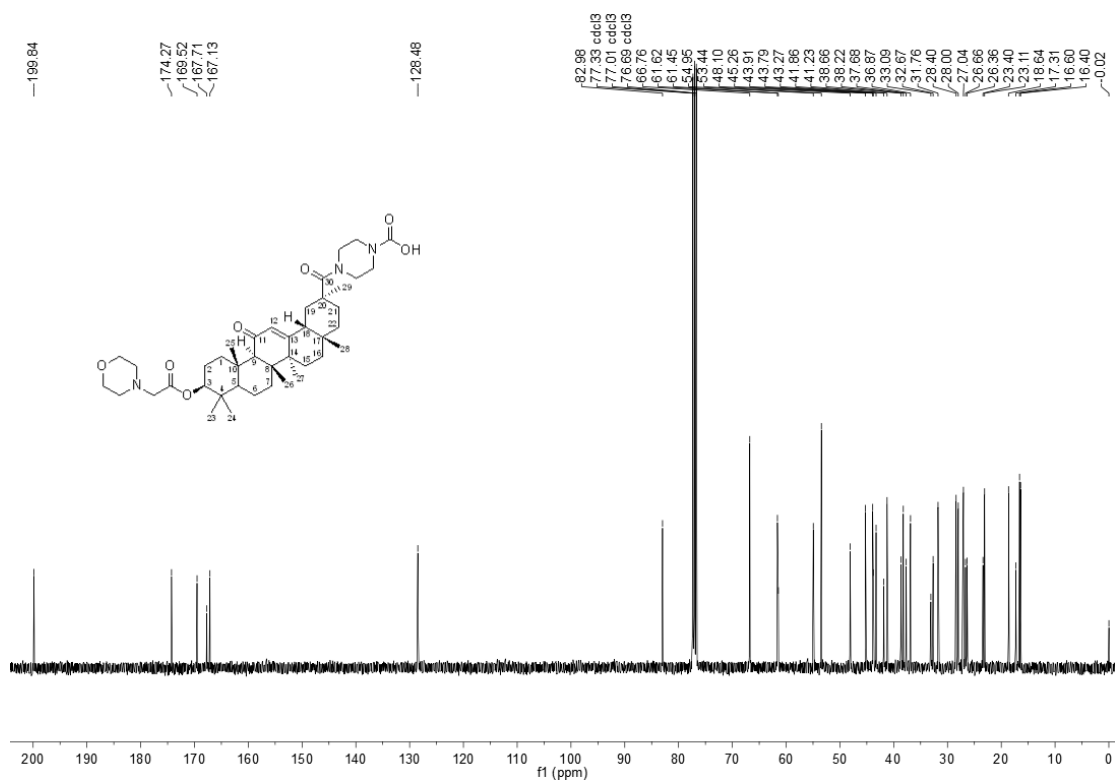

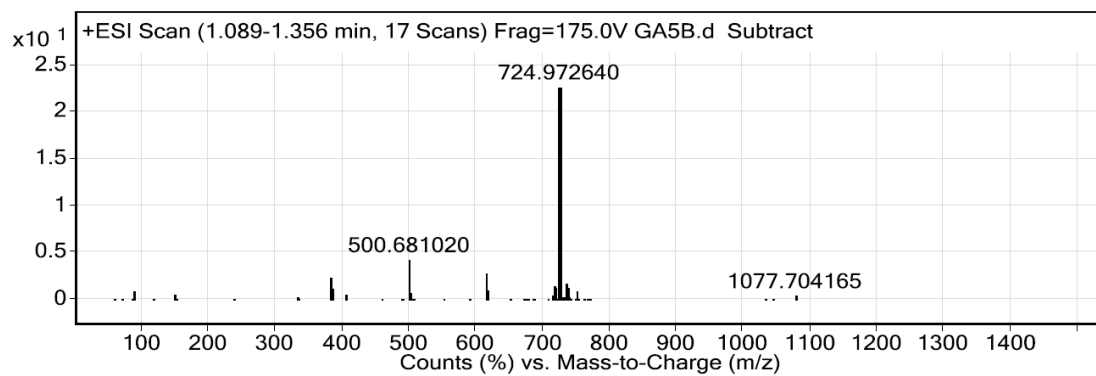

*3β-Acetoxy-11-oxo-18β-olean-12-en-30-carbonyl piperazine (4)*

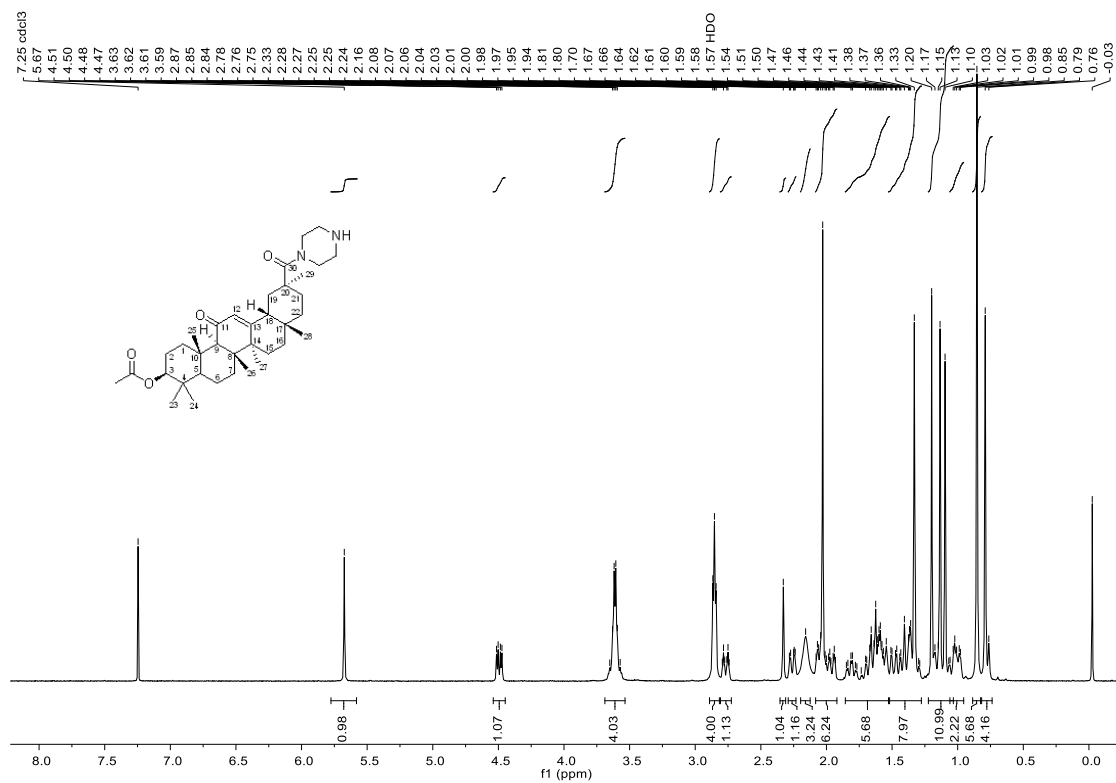

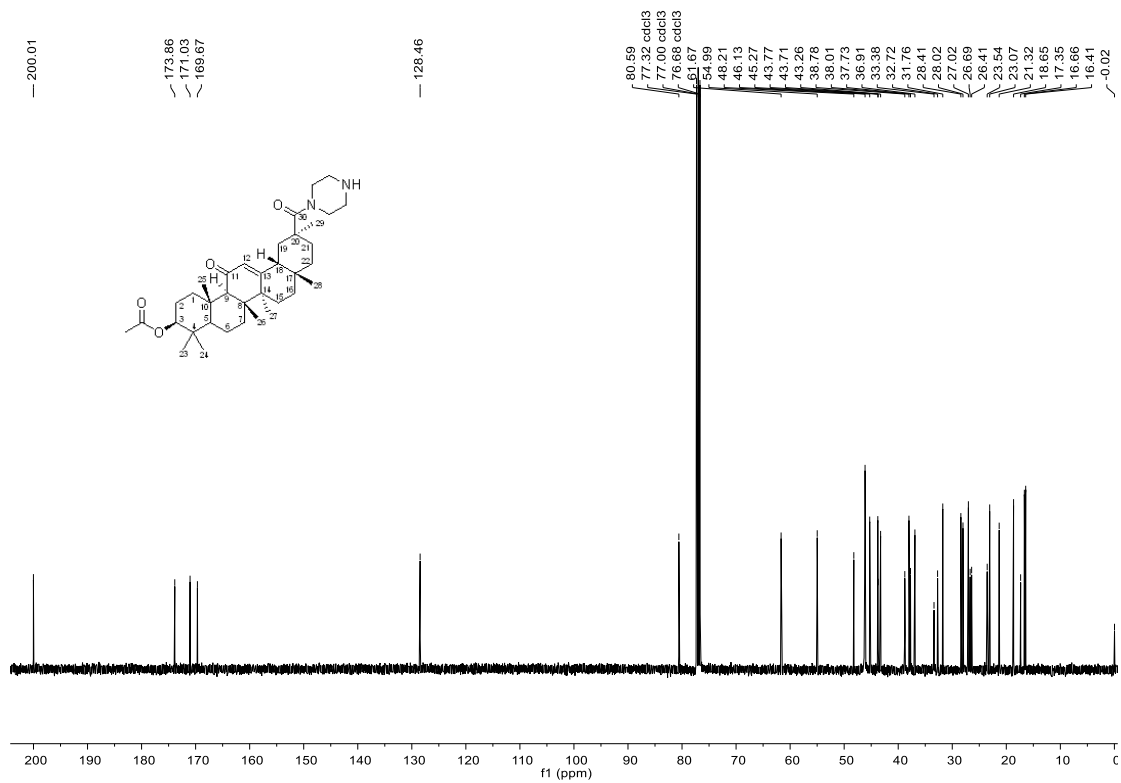

GC3 #153 RT: 1.26 AV: 1 NL: 2.18E8  
 F: FTMS + p ESI Full ms [100.00-1000.00]

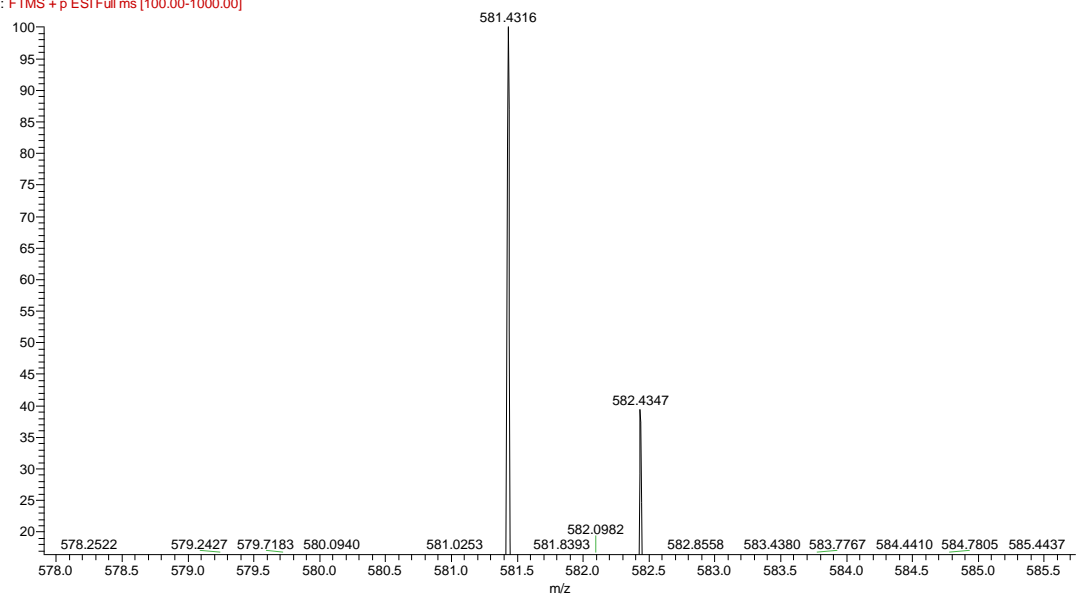

Bisamide product 5

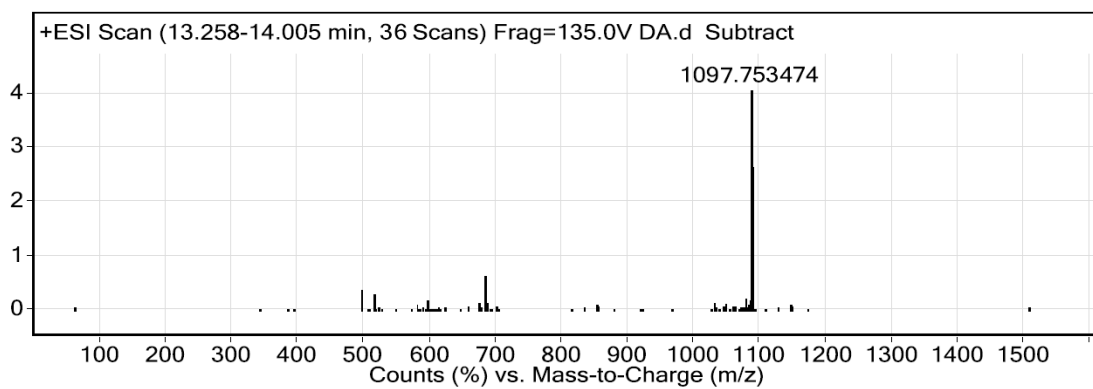

*3β*-(2-Morpholinoacetoxy)-11-oxo-18β-olean-12-en-30-carbonyl piperazine (**17**)

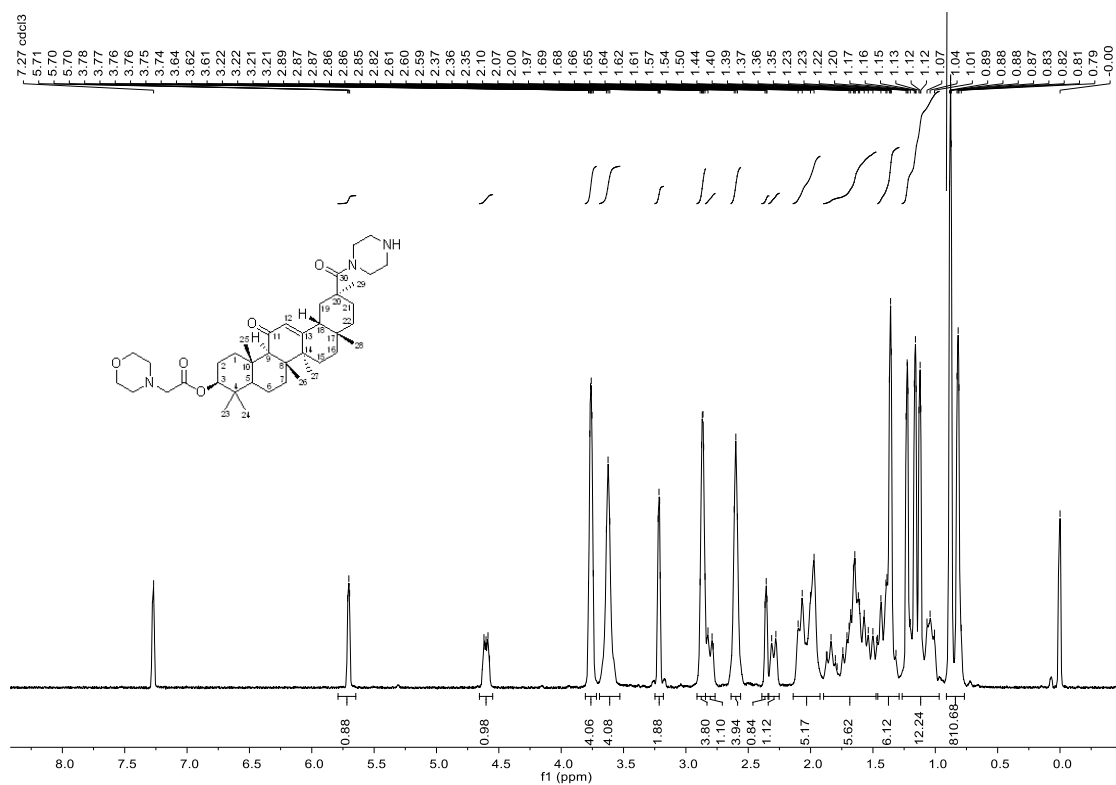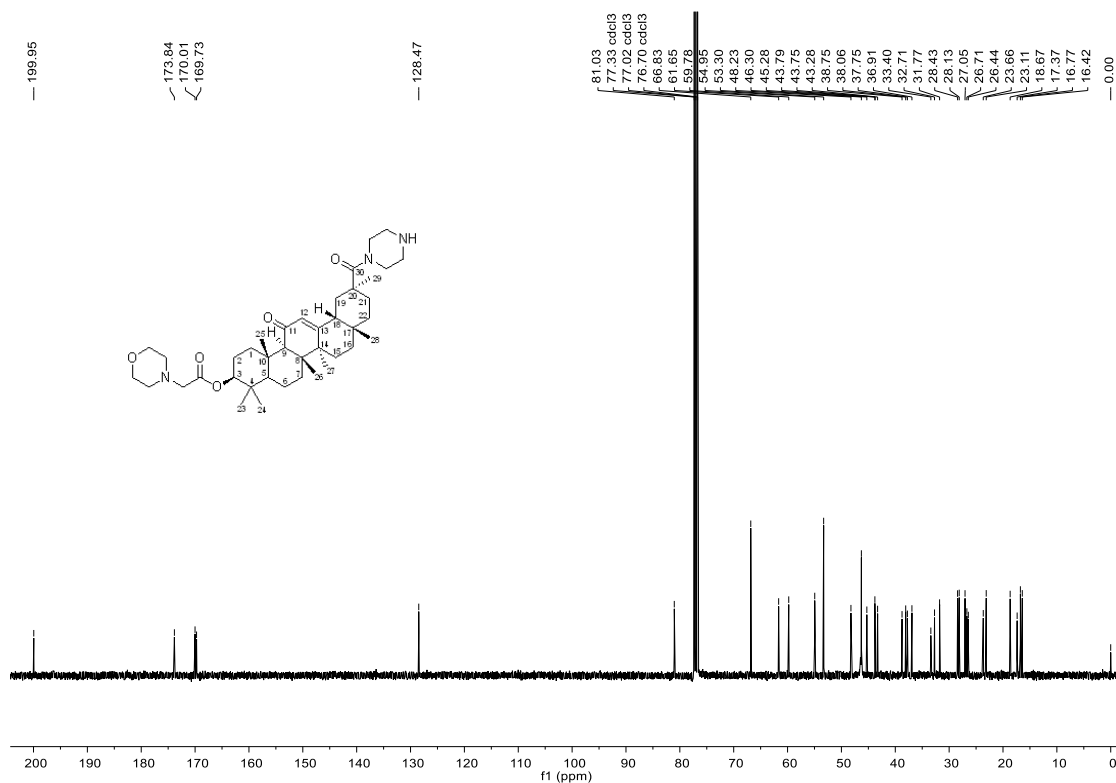

GC2 #188 RT: 1.54 AV: 1 NL: 1.37E7  
F: FTMS + p ESI Full ms [100.00-1000.00]

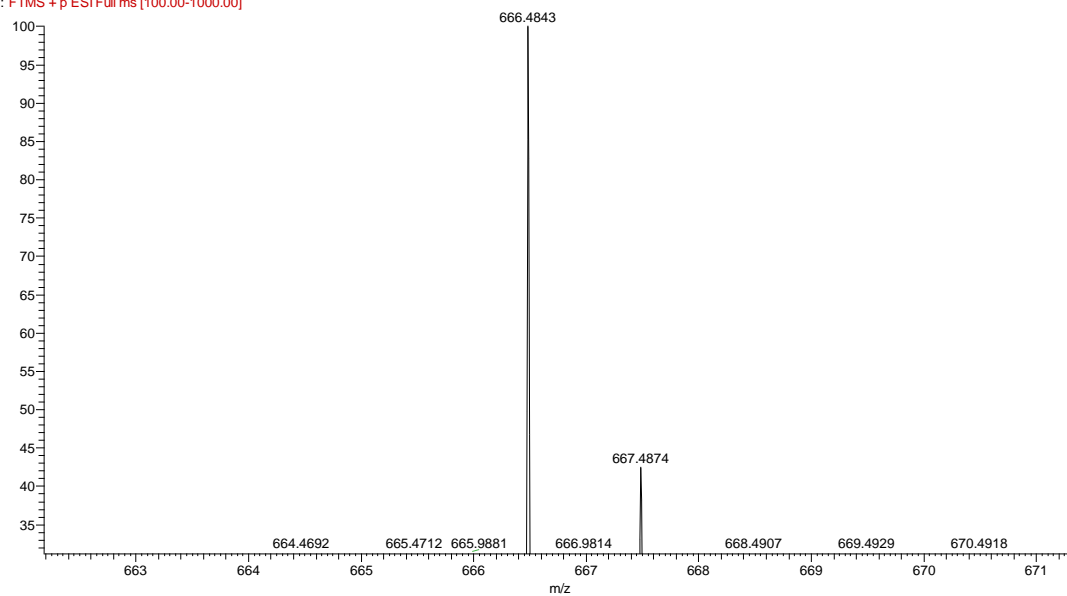

***3 $\beta$ -Acetoxy-30-(4-(3-fluorobenzoyl)-1-piperazinylolean-12-ene-11,30-dione (18)***

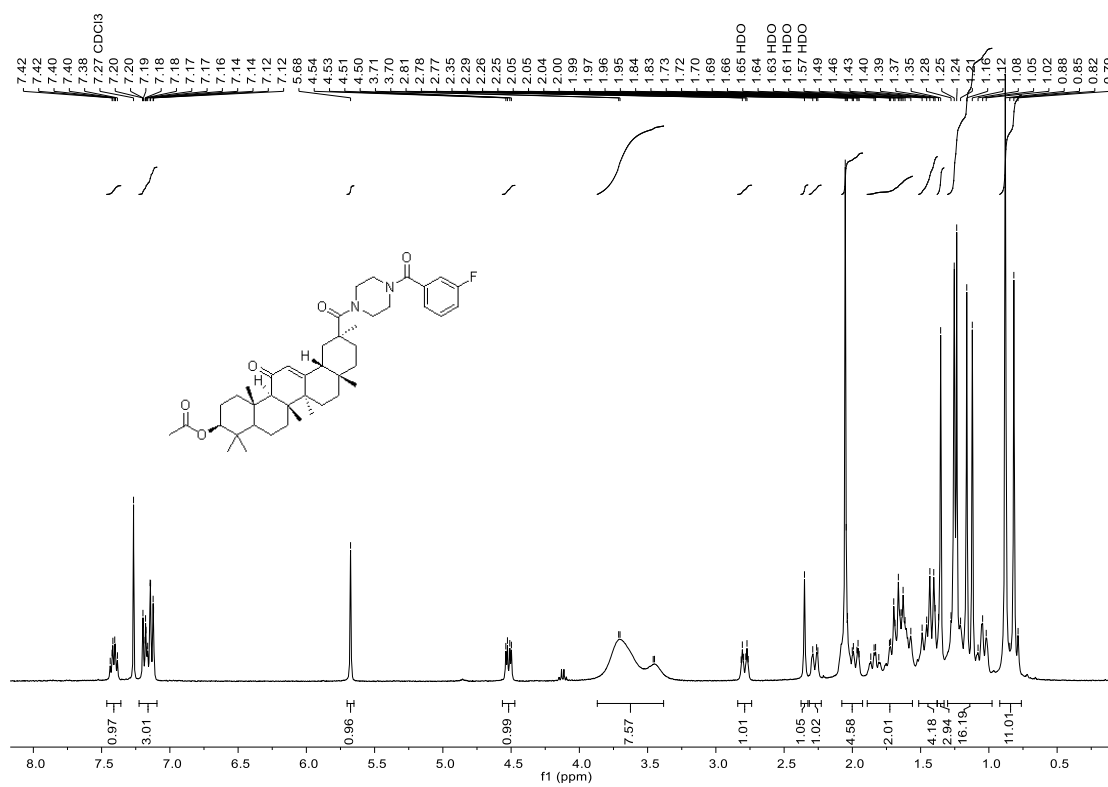

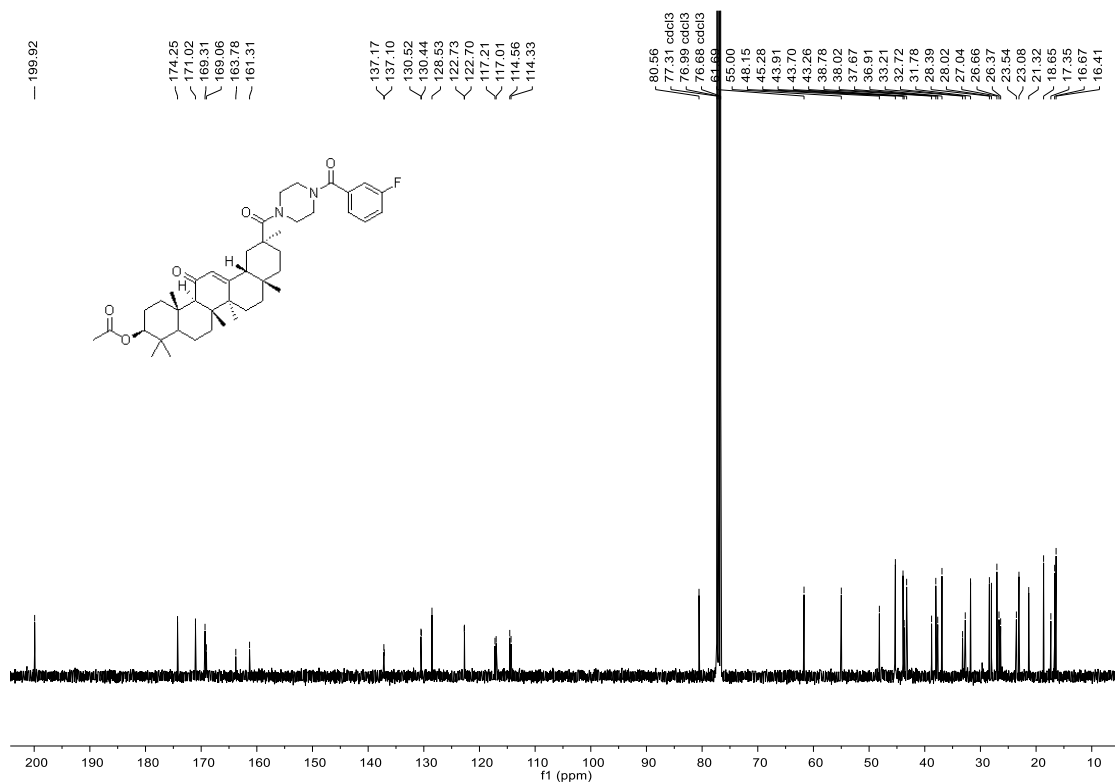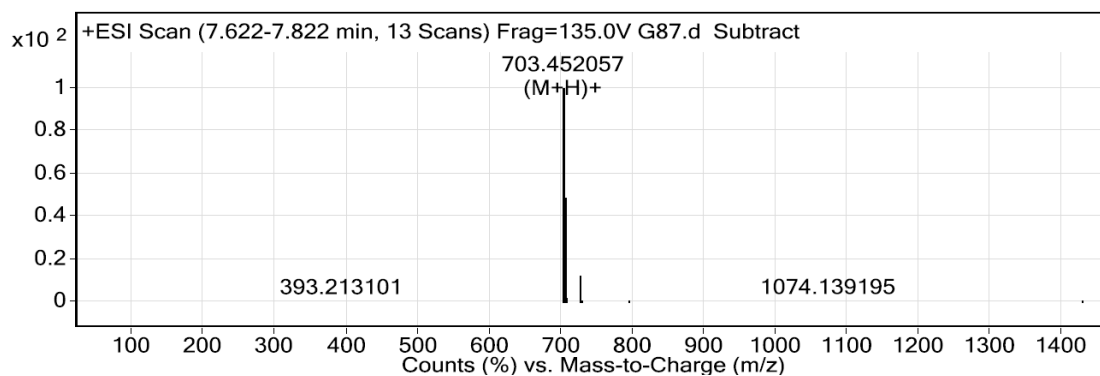

1. Song, H.; Sun, Y.; Xu, G.; Hou, B.; Ao, G. Synthesis and biological evaluation of novel hydrogen sulfide releasing glycyrrhetic acid derivatives. *J. Enzyme Inhib. Med. Chem.* **2016**, *31* (6), 1457-1463.
2. Sommerwerk, S.; Heller, L.; Kerzig, C.; Kramell, A. E.; Csuk, R. Rhodamine B conjugates of triterpenic acids are cytotoxic mitocans even at nanomolar concentrations. *Eur. J. Med. Chem.* **2017**, *127*, 1-9.
